# Supplementary material for: An improved SNAP-ADAR tool enables efficient RNA base editing to interfere with post-translational protein modification
Source: PubMed Central journal article supplement (PMC11300799; doi:10.1038/s41467-024-50395-w), 2024-08-05
Supplement: 41467_2024_50395_MOESM1_ESM.pdf [file 41467_2024_50395_MOESM1_ESM.pdf]

## **An Improved SNAP-ADAR Tool Enables Efficient RNA Base Editing to Interfere with Post-translational Protein Modification**

Karthika Devi Kiran Kumar,<sup>1</sup> Shubhangi Singh,<sup>1</sup> Stella Maria Schmelzle,<sup>1</sup> Paul Vogel,<sup>2</sup> Carolin Fruhner,<sup>1</sup> Alfred Hanswillemenke,<sup>1</sup> Adrian Brun,<sup>1</sup> Jacqueline Wettengel,<sup>1</sup> Yvonne Füll,<sup>1</sup> Lukas Funk,<sup>1</sup> Valentin Mast,<sup>1</sup> J. Josephine Botsch,<sup>1</sup> Philipp Reautschnig,<sup>1</sup> Jin Billy Li<sup>2</sup> and Thorsten Stafforst<sup>1,3</sup>

<sup>1</sup>Interfaculty Institute of Biochemistry, University of Tübingen (Germany)

<sup>2</sup>Department of Genetics, Stanford University, Stanford, CA (USA)

<sup>3</sup>Gene and RNA Therapy Center (GRTC), Faculty of Medicine University Tübingen (Germany)

## Supplementary Figures

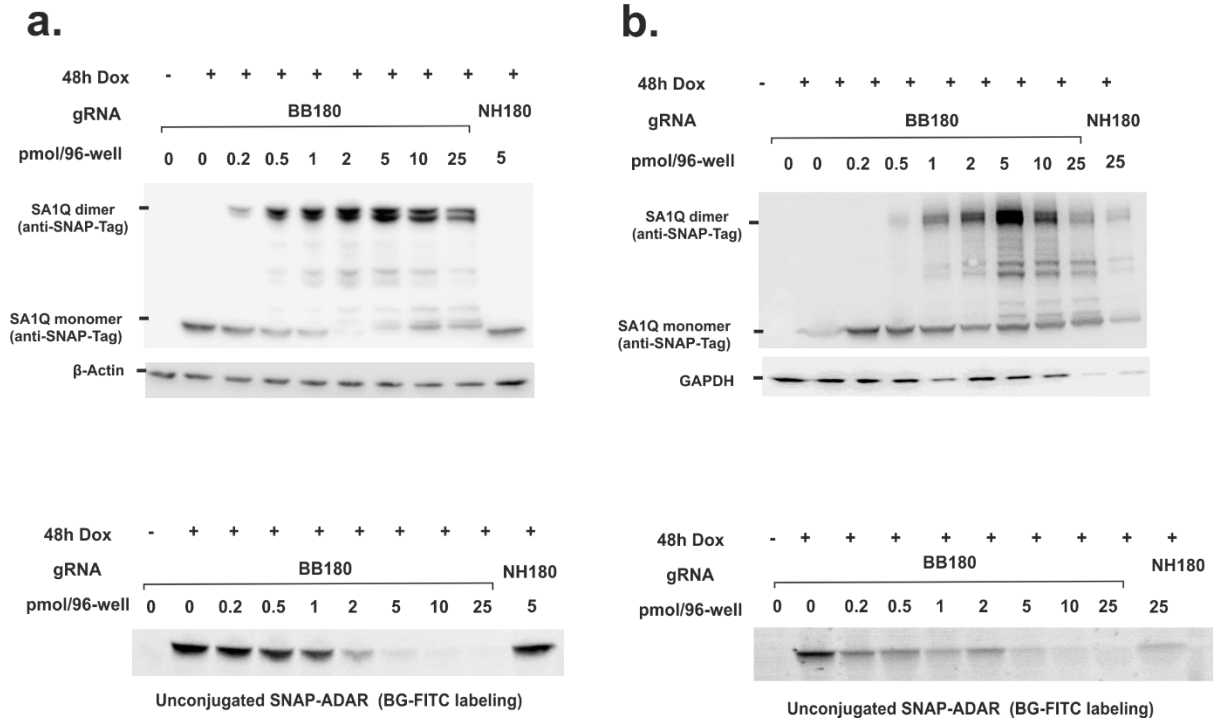

**Supplementary Figure 1** Blots showing guideRNA dose-dependent dimerization of the effector SA1Q in Flp-In T-Rex 293 – SA1Q cells induced with 10ng/ml Doxycycline for 48 hrs. Cells were transfected with indicated amounts of BB180 (BisBG-25 nt + LNA gRNA against STAT1 Y701 site) or NH180 (gRNA lacking the BisBG moiety for SA attachment). **A)** and **B)** are biological replicates (N=2) of Fig.1d, with Western blot (blot on top) and BG-FITC -protein/gRNA conjugation assay blot (blot in the bottom) respectively, showing gRNA dose-dependent of SA1Q dimerization in cells induced for 48hrs with Doxycycline. GAPDH/β-Actin served as loading controls. All guide RNA amounts denote pmol/96-well with 150 μl total volume. Western blotting and BG-FITC staining were done as described in the methods section. Full blots are available in the Source Data file.

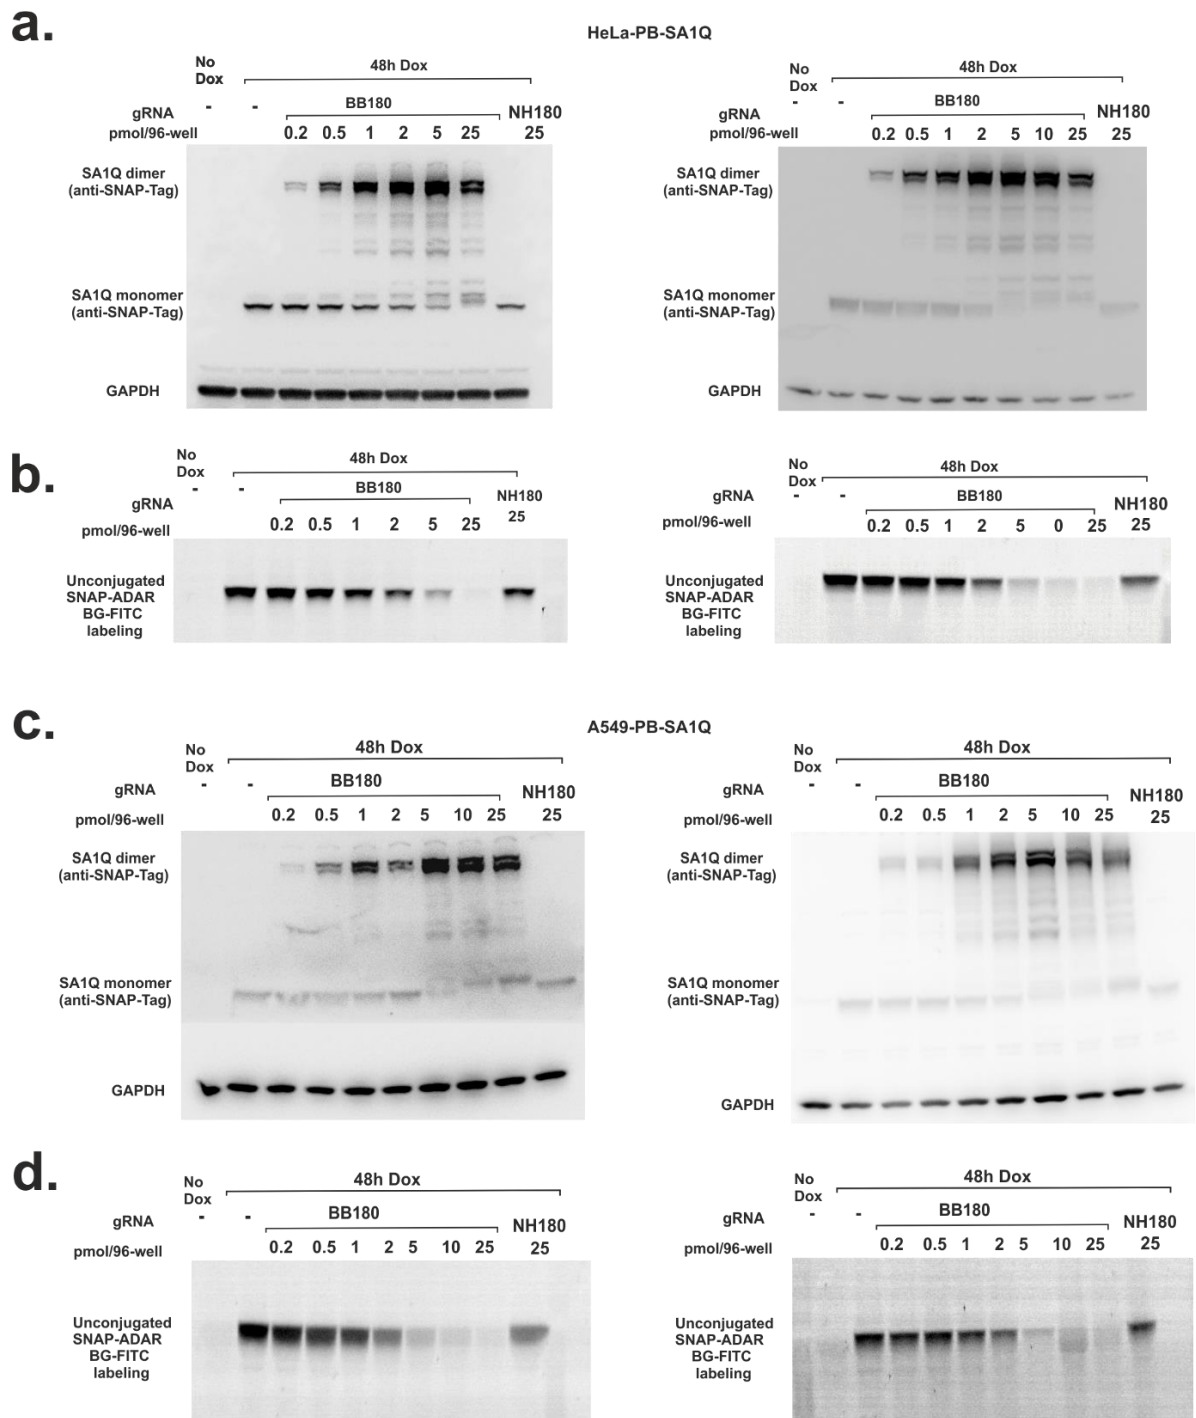

**Supplementary Figure 2.** Blots showing biological replicates (N=2) of SNAP-ADAR protein expression and its conjugation with gRNA studied in HeLa-PB-SA1Q and A549-PB-SA1Q cells using Western blot and BG-FITC-protein/gRNA conjugation assay. Cells were transfected with different amounts of BisBG-25 nt + LNA gRNA against STAT1 Y701 site (BB180) in 96-well plate set up with 1 $\mu$ g/ml doxycycline induction for 48h. NH180 denotes gRNA lacking the BisBG moiety for SA attachment. **A)** and **B)** show Western blots and BG-FITC blots (replicates) respectively for HeLa-PB-SA1Q cells. **C)** and **D)** show Western blots and BG-FITC blots (replicates) respectively for A549-PB-SA1Q cells. GAPDH served as loading control. All guide RNA amounts denote pmol/96-well with 150  $\mu$ l total volume. Western blotting and BG-FITC staining were done as described in the methods section. Full blots are available in the Source Data file.

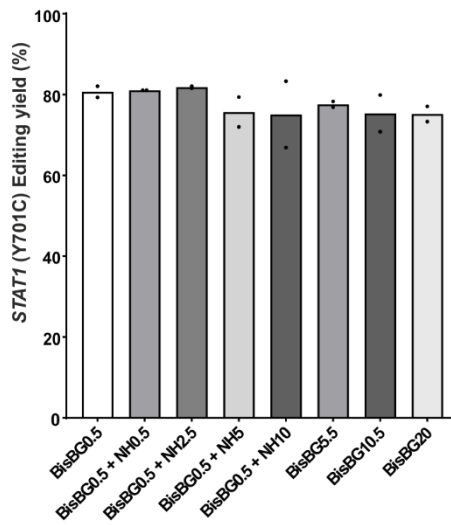

**Supplementary Figure 3.** Competitive editing experiment of editing-competent BisBG guide RNAs with editing-incompetent amino guide RNA of the same sequence and chemical modification. In Flp-In T-REx 293 SA1Q cells, the editing-competent BisBG 180 guide (0.5 pmol per 96 well) and an increasing amount (0.5-10 pmol per 96-well) of the same editing-incompetent NH180 control guide RNA against the transcript STAT1 (Y701>C site) were co-transfected. Even a 20x excess of amino control guide RNA (NH180) did not reduce the editing yield with 0.5 pmol BisBG guide RNA, indicating that the guide RNAs act on the target RNA rather in a hit-and-run fashion than staying at the target for a long time. Furthermore, editing yield for increasing BisBG guide RNA concentrations (up to 20 pmol/96 well) are shown. The data is presented as N=2 biological replicates, as indicated by individual data points. Source data are provided in Source Data file.

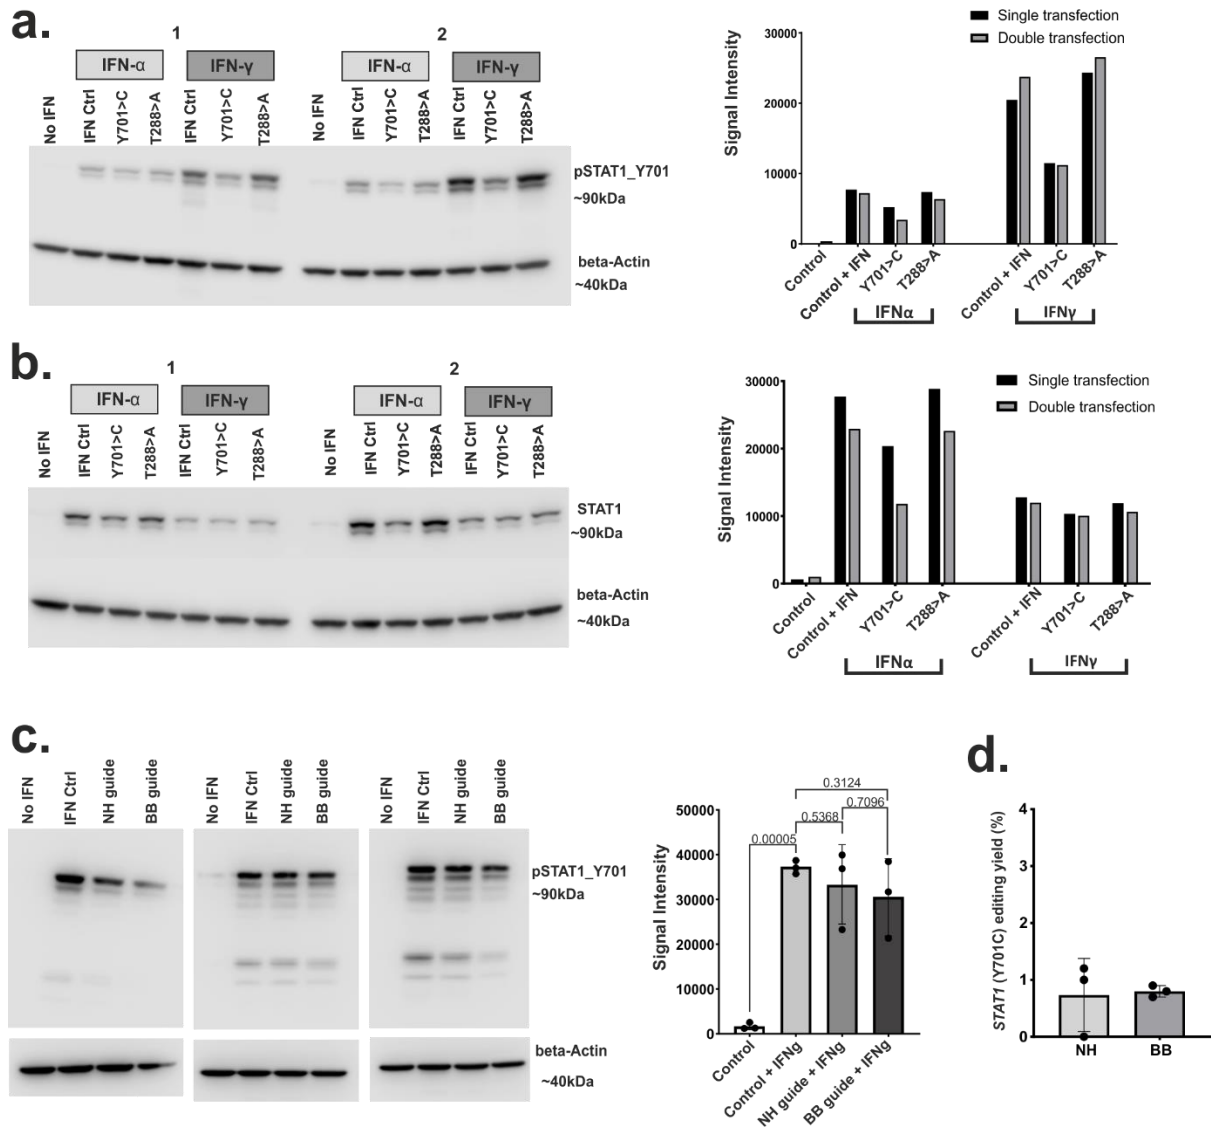

**Supplementary Figure 4.** Analysis of STAT1 activation (tyrosine 701 phosphorylation) by Western Blot in response to up (T288>A) and down regulating (Y701>C) PTMi. **A)** Shows phospho-STAT1 and **B)** shows total STAT1 in response to various PTMi settings and induction by interferon- $\alpha$  and - $\gamma$ , as indicated. **Experiment 1 in A) and B):** Dox (1  $\mu\text{g/ml}$ , 72h total), single transfection (T1) in 24 well plate with  $2 \times 10^5$  cells and 8 pmol guide per well, 2000 u/ml IFN  $\alpha$  or  $\gamma$  induction 24h prior to lysis. **Experiment 2 in A) and B):** Dox (1  $\mu\text{g/ml}$ , 120h total), double transfection (T2) with 48h in between, in 24 well plate with  $2 \times 10^5$  cells and 8 pmol guide per well, 2000 U/ml IFN- $\alpha$  or - $\gamma$  induction 24h prior to lysis. **C)** Effect of an editing-incompetent guide RNA that can (BB482 = BisBG 482) or cannot (NH482) recruit the SNAP-ADAR effector on target protein expression (pSTAT1) by Western Blot. The bar graph includes a statistical analysis of the band intensities, with P values indicated. Applied was a 2-winged t-test, N=3; P>0.05 is interpreted as non-significant. **D)** The editing-incompetent guide RNA BisBG 482 was unable to induce the Y701>C edit in STAT1. Source data are provided as a Source Data file.

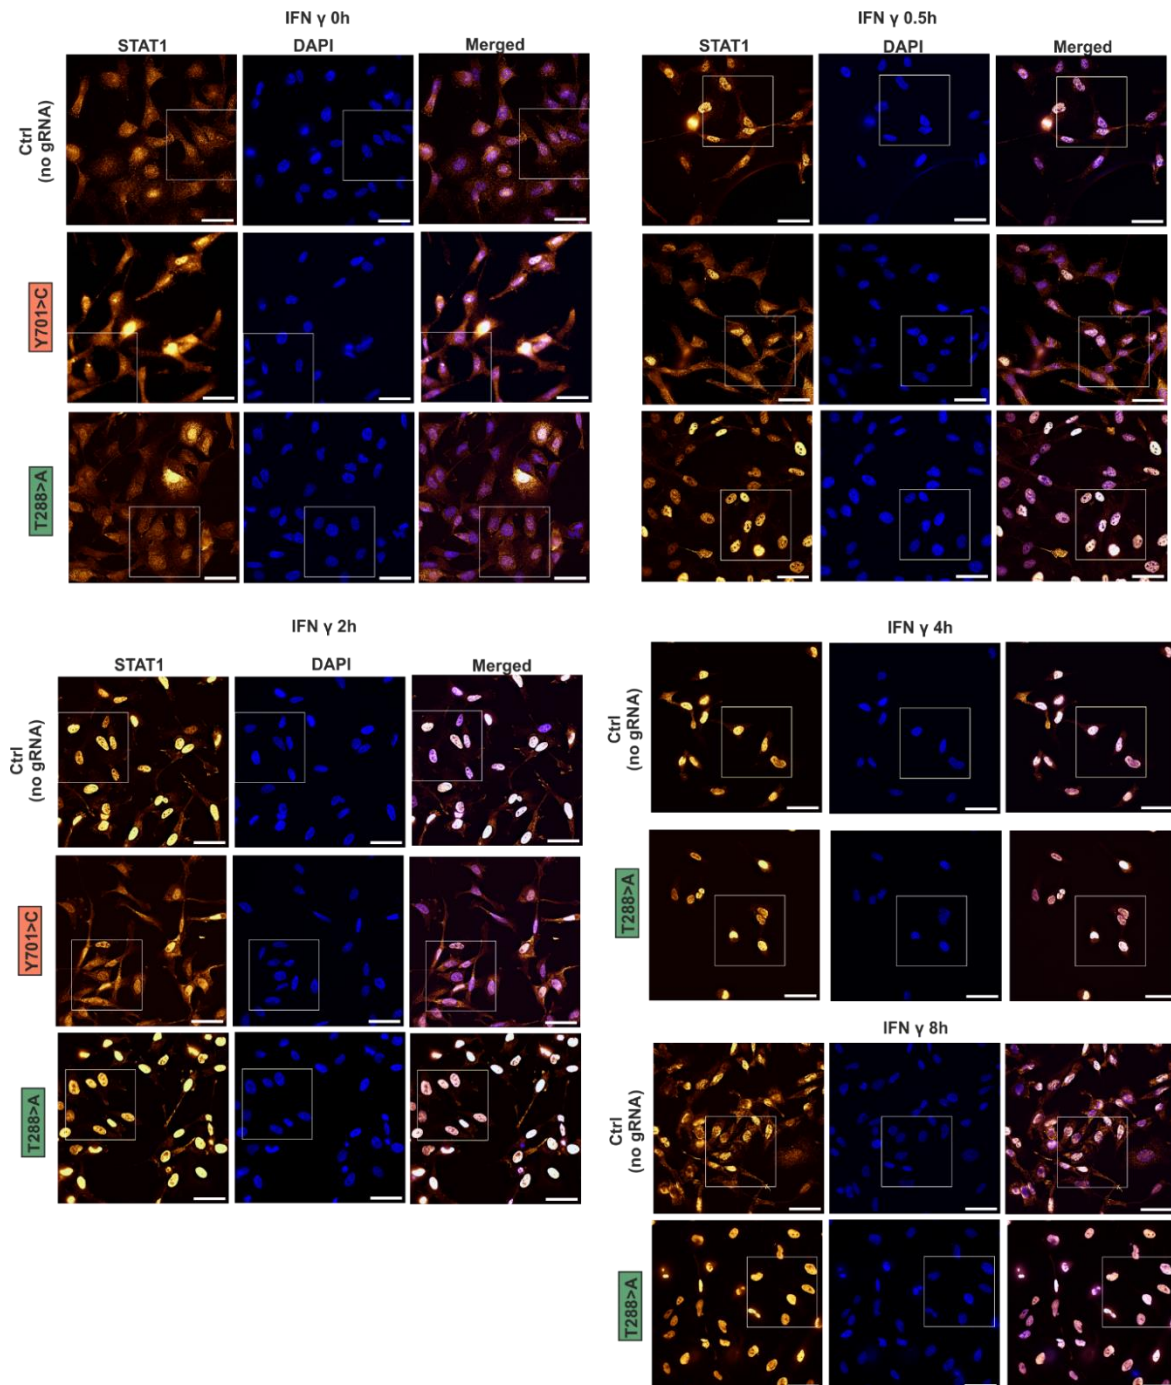

**Supplementary Figure 5.** Immunofluorescence imaging of total STAT1 cellular localization upon different gRNA treatment vs control (no gRNA), at various time points post IFN- $\gamma$  induction. Insets show zoomed-in areas shown in Fig. 5d. For detailed protocol and list of antibodies, see the Methods section and Supplementary Table 1, respectively. Images were taken with a Nikon Eclipse Ti2-E inverted fluorescent microscope, equipped with a photometrics® Prime 95B camera and a lumencor® Aurall light engine. All pictures were recorded using a 60x oil objective (numerical aperture 1.4) and Olympus IMMOIL-F30CC immersion oil. The excitation wavelengths and corresponding filter sets used to record each channel are specified in Supplementary Table 2. The same acquisition settings were chosen for each channel for all images. The images were 3D deconvoluted, and further processed in FIJI ImageJ<sup>1</sup>. Amber LUT, used to display STAT1 protein, was obtained from ImageJ Wiki – NucMed LUT list<sup>2</sup>. For more details on LUT, see Source Data.

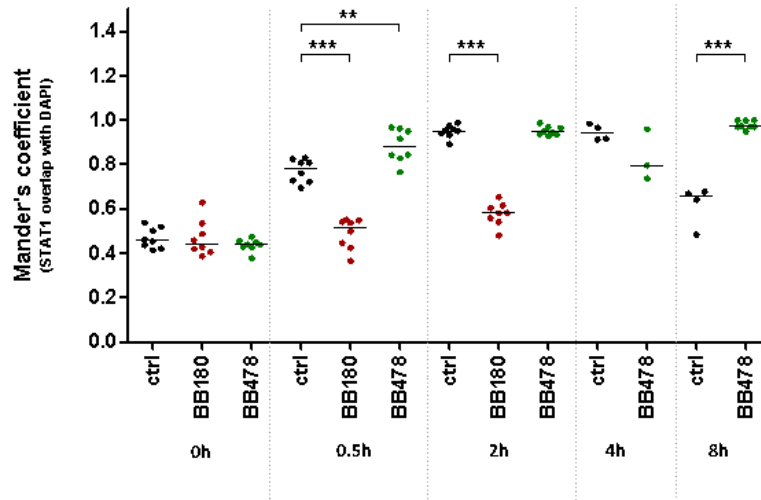

**Supplementary Figure 6.** Colocalization analysis. Mander's coefficient for the overlap of total STAT1 protein signal with nuclear DAPI signal was determined and plotted for each condition using the JACoP plug-in<sup>3</sup> in FIJI ImageJ<sup>1</sup>. An unbiased sectioning of biological replicate images (N =2 for most, N =1 for some) into quadrants was done. Significance for N= 3,4 or 8 sections was determined by an unpaired, two-tailed t-test,  $P \leq 0.05 = *$ ,  $P \leq 0.01 = **$ ,  $P \leq 0.001 = ***$ ,  $P > 0.05 =$  nonsignificant. Individual data points are given, the median is denoted by a black line. Source data are provided as a Source Data file.

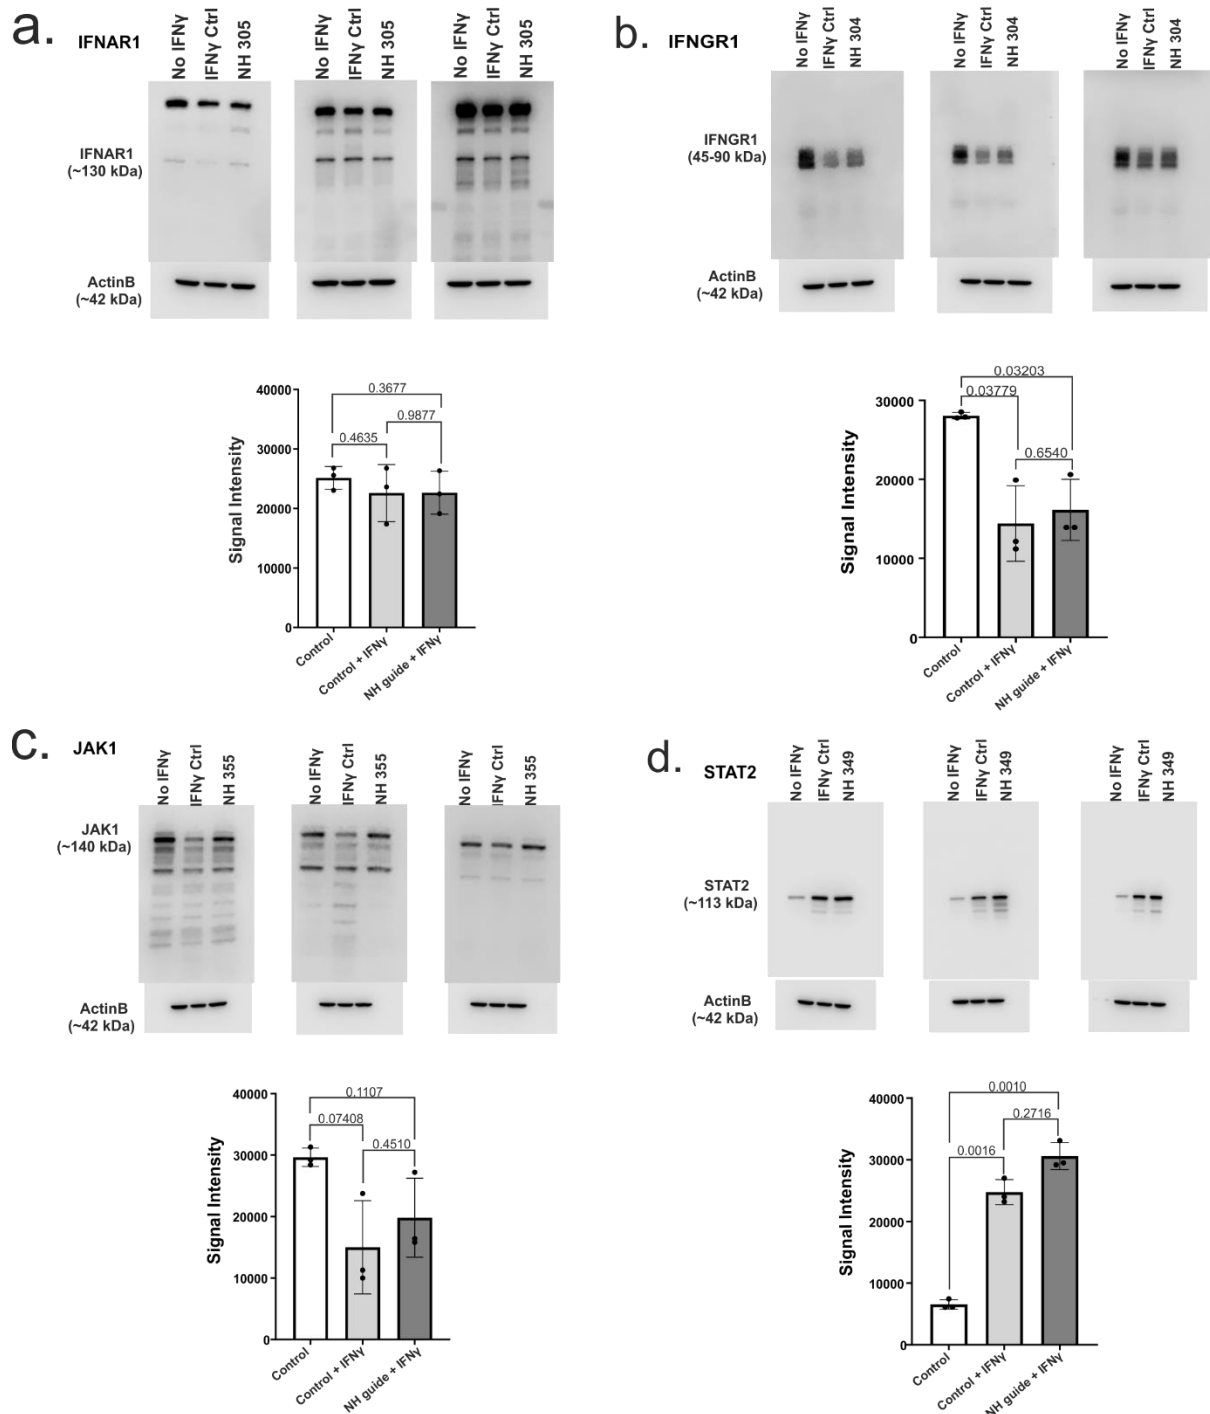

**Supplementary Figure 7.** Analysis of the effect of guide RNA transfection with or without IFN- $\gamma$  induction on the protein expression of four different PTMi targets by Western Blot. The bar graphs show the statistical analysis of the band intensities, with P values indicated. Applied was a 2-winged t-test, N=3;  $P > 0.05$  is interpreted as non-significant. **A)** For the IFNAR1 target. **B)** For the IFNGR1 target. **C)** For the JAK1 target. **D)** For the STAT2 target. Dox (1  $\mu\text{g}/\text{ml}$ , 120h total), double transfection (T2) with 48 h in between, in 24 well plate with  $2 \times 10^5$  cells and 8 pmol guide per well, 2000 u/ml IFN- $\gamma$  induction 24 h prior to cell lysis. Full Western blots and Source data are provided as a Source Data file.



## References

1. Schneider, C. A., Rasband, W. S. & Eliceiri, K. W. NIH Image to ImageJ: 25 years of image analysis. *Nat Methods* **9**, 671–675 (2012).
2. [https://imagej.net/ij/download/luts/NucMed\\_Image\\_LUTs/](https://imagej.net/ij/download/luts/NucMed_Image_LUTs/).
3. BOLTE, S. & CORDELIÈRES, F. P. A guided tour into subcellular colocalization analysis in light microscopy. *J Microsc* **224**, 213–232 (2006).

## Supplementary Tables

**Supplementary Table 1** All antibodies were diluted in 5% dry milk in 1x TBST buffer.

| Antibody                                                          | Cat.no.     | Manufacturer                         | Dilution |
|-------------------------------------------------------------------|-------------|--------------------------------------|----------|
| Mouse $\alpha$ -Beta-Actin                                        | A5441       | Sigma                                | 1: 5000  |
| Rabbit $\alpha$ -SNAP-tag                                         | P9310S      | New England Biolabs                  | 1: 1000  |
| $\alpha$ -SNAP Tag Polyclonal Antibody                            | CAB4255     | Thermo-Fisher Scientific             | 1: 1000  |
| Mouse- $\alpha$ -GAPDH Loading Control Monoclonal Antibody (GA1R) | MA5-15738   | Thermo-Fisher Scientific             | 1: 1000  |
| Mouse- $\alpha$ -GAPDH Monoclonal Antibody (6C5)                  | AM4300      | Thermo-Fisher Scientific             | 1: 1000  |
| Rabbit- $\alpha$ -Gapdh (D16H11) XP                               | 5174T/5174S | Cell Signalling                      | 1: 2000  |
| pSTAT1(Y701)                                                      | 9167        | Cell Signalling                      | 1: 1000  |
| STAT1 mouse                                                       | 9176        | Cell Signalling                      | 1: 1000  |
| STAT1 (42H3) Rabbit                                               | 9175        | Cell Signalling                      | 1: 1000  |
| Goat $\alpha$ -Rabbit Alexa Fluor 594                             | 8889S       | Cell Signalling                      | 1: 1000  |
| Goat $\alpha$ -Rabbit HRP                                         | 111-035-003 | Jackson Immuno Research Laboratories | 1: 10000 |
| Goat $\alpha$ -Mouse HRP                                          | 115-035-003 | Jackson Immuno Research Laboratories | 1: 10000 |
| IFNAR1 rabbit                                                     | MA5-32006   | Thermo-Fisher Scientific             | 1: 1000  |
| JAK1 mouse                                                        | 50996       | Cell Signaling                       | 1: 1000  |
| STAT1 Rabbit                                                      | 9172        | Cell Signaling                       | 1: 1000  |
| IFNGR1 rabbit                                                     | 34808       | Cell Signaling                       | 1: 1000  |
| STAT2 rabbit                                                      | 72604       | Cell Signaling                       | 1: 1000  |

**Supplementary Table 2** Excitation wavelengths and corresponding filter sets used with Nikon Eclipse Ti2-Emicroscope.

| <b>Fluorophore</b> | <b>Excitation</b> | <b>Filter</b>                                                                                                       |
|--------------------|-------------------|---------------------------------------------------------------------------------------------------------------------|
| eGFP/FITC          | 475 nM            | Excitation: Chroma 89402x<br>Beamsplitter: Chroma 89402bs<br>Emission: Chroma 89402m                                |
| Atto594            | 575 nM            | Excitation: Semrock 585/29 BrightLine HC<br>Beamsplitter: Chroma T610LPXR<br>Emission: Semrock 650/60 BrightLine HC |
| NucBlue (DAPI)     | 390 nM            | Excitation: Chroma 89402x<br>Beamsplitter: Chroma 89402bs<br>Emission: Chroma 89402m                                |

## Gene and protein sequences for SNAP-ADAR versions used:

Gene & protein sequence of the SA1Q as expressed from engineered Flp-In-TREx 293 genome. E>Q site is highlighted in cyan.

```

      10      20      30      40      50      60
1      ATGGACAAAGACTGCGAAATGAAGCGCACCCACCTGGATAGCCCTCTGGGCAAGCTGGAA
1      M D K D C E M K R T T L D S P L G K L E

      70      80      90      100     110     120
61     CTGTCTGGGTGCGAACAGGGCCTGCACCGTATCATCTTCCTGGGCAAAGGAACATCTGCC
21     L S G C E Q G L H R I I F L G K G T S A

      130     140     150     160     170     180
121    GCCGACGCCGTGGAAGTGCCCTGCCCCAGCCCGCTGCTGGGCGGACCAGAGCCACTGATG
41    A D A V E V P A P A A V L G G P E P L M

      190     200     210     220     230     240
181    CAGGCCACCGCTGGCTCAACGCCTACTTTACCAGCCTGAGGCCATCGAGGAGTTCCCT
61    Q A T A W L N A Y F H Q P E A I E E F P

      250     260     270     280     290     300
241    GTGCCAGCCCTGCACCACCCAGTGTTCAGCAGGAGAGCTTTACCCGCCAGGTGCTGTGG
81    V P A L H H P V F Q Q E S F T R Q V L W

      310     320     330     340     350     360
301    AAAGTGTGAAAGTGGTGAAGTTCCGGAGAGGTCATCAGCTACAGCCACCTGGCCGCCCTG
101   K L L K V V K F G E V I S Y S H L A A L

      370     380     390     400     410     420
361    GCCGGCAATCCCCGCCACCAGCCCGCTGAAAACCGCCCTGAGCGGAAATCCCGTGCC
121   A G N P A A T A A V K T A L S G N P V P

      430     440     450     460     470     480
421    ATTCTGATCCCCCTGCCACCGGGTGGTGCAGGGCGACCTGGACGTGGGGGGCTACGAGGGC
141   I L I P C H R V V Q G D L D V G G Y E G

      490     500     510     520     530     540
481    GGGCTCGCCGTGAAAGAGTGGCTGCTGGCCACGAGGGCCACAGACTGGGCAAGCCTGGG
161   G L A V K E W L L A H E G H R L G K P G

      550     560     570     580     590     600
541    CTGGGTCTCTGCAGGCGGAGGCGGCCAGGGTCTGGCGGCGGCAGTAAGGCAGAACGCATG
181   L G P A G G G A P G S G G G S K A E R M

      610     620     630     640     650     660
601    GGTTCACAGAGGTAACCCCAGTGACAGGGGCCAGTCTCAGAAGAACTATGCTCCTCCTC
201   G F T E V T P V T G A S L R R T M L L L

      670     680     690     700     710     720
661    TCAAGGTCCCCAGAAGCACAGCCAAAGACACTCCCTCTCACTGGCAGCACCTTCCATGAC
221   S R S P E A Q P K T L P L T G S T F H D

      730     740     750     760     770     780
721    CAGATAGCCATGCTGAGCCACCGGTGCTTCAACACTCTGACTAACAGCTTCCAGCCCTCC
241   Q I A M L S H R C F N T L T N S F Q P S
```

781 790 800 810 820 830 840  
TTGCTCGGCCGCAAGATTCTGGCCGCCATCATTATGAAAAAAGACTCTGAGGACATGGGT  
261 L L G R K I L A A I I M K K D S E D M G

841 850 860 870 880 890 900  
GTCGTCGTCAGCTTGGGAACAGGGAATCGCTGTGTAAAAAGGAGATTCTCTCAGCCTAAAA  
281 V V V S L G T G N R C V K G D S L S L K

901 910 920 930 940 950 960  
GGAGAAACTGTCAATGACTGCCATGCAGAAATAATCTCCCGGAGAGGCTTCATCAGGTTT  
301 G E T V N D C H A E I I S R R G F I R F

961 970 980 990 1000 1010 1020  
CTCTACAGTGAGTTAATGAAATACAACCTCCCAGACTGCGAAGGATAGTATATTTGAACCT  
321 L Y S E L M K Y N S Q T A K D S I F E P

1021 1030 1040 1050 1060 1070 1080  
GCTAAGGGAGGAGAAAAAGCTCCAAATAAAAAAGACTGTGTCAATCCATCTGTATATCAGC  
341 A K G G E K L Q I K K T V S F H L Y I S

1081 1090 1100 1110 1120 1130 1140  
ACTGCTCCGTGTGGAGATGGCGCCCTCTTTGACAAGTCCCTGCAGCGACCGTGTATGGAA  
361 T A P C G D G A L F D K S C S D R A M E

1141 1150 1160 1170 1180 1190 1200  
AGCACAGAATCCCGCCACTACCCTGTCTTCGAGAATCCCAAACAAGGAAAGCTCCGCACC  
381 S T E S R H Y P V F E N P K Q G K L R T

1201 1210 1220 1230 1240 1250 1260  
AAGGTGGAGAACGGACAAGGCACAATCCCTGTGGAATCCAGTGACATTGTGCCTACGTGG  
401 K V E N G Q G T I P V E S S D I V P T W

1261 1270 1280 1290 1300 1310 1320  
GATGGCATTTCGGCTCGGGGAGAGACTCCGTACCATGTCTGTAGTGACAAAATCCTACGC  
421 D G I R L G E R L R T M S C S D K I L R

1321 1330 1340 1350 1360 1370 1380  
TGGAACGTGCTGGGCCTGCAAGGGGCACTGTTGACCCACTTCCTGCAGCCCATTTATCTC  
441 W N V L G L Q G A L L T H F L Q P I Y L

1381 1390 1400 1410 1420 1430 1440  
AAATCTGTACATTGGGTTACCTTTTCAGCCAAGGGCATCTGACCCGTGCTATTTGCTGT  
461 K S V T L G Y L F S Q G H L T R A I C C

1441 1450 1460 1470 1480 1490 1500  
CGTGTGACAAGAGATGGGAGTGCATTTGAGGATGGACTACGACATCCCTTTATTGTCAAC  
481 R V T R D G S A F E D G L R H P F I V N

1501 1510 1520 1530 1540 1550 1560  
CACCCAAAGGTTGGCAGAGTCAGCATATATGATTCCAAAAGGCAATCCGGGAAGACTAAG  
501 H P K V G R V S I Y D S K R Q S G K T K

1561 1570 1580 1590 1600 1610 1620  
GAGACAAGCGTCAACTGGTGTCTGGCTGATGGCTATGACCTGGAGATCCTGGACGGTACC  
521 E T S V N W C L A D G Y D L E I L D G T

1621 1630 1640 1650 1660 1670 1680  
AGAGGCACTGTGGATGGGCCACGGAATGAATTGTCCCGGGTCTCCAAAAAGAACATTTTT  
541 R G T V D G P R N E L S R V S K K N I F

1690 1700 1710 1720 1730 1740

1681 CTTCTATTTAAGAAGCTCTGCTCCTTCCGTTACCGCAGGGATCTACTGAGACTCTCCTAT  
561 L L F K K L C S F R Y R R D L L R L S Y

1741 1750 1760 1770 1780 1790 1800  
GGTGAGGCCAAGAAAGCTGCCCCGTGACTACGAGACGGCCAAGAACTACTTCAAAAAAGGC  
581 G E A K K A A R D Y E T A K N Y F K K G

1801 1810 1820 1830 1840 1850 1860  
CTGAAGGATATGGGCTATGGGAACTGGATTAGCAAACCCAGGAGGAAAAGAACTTTTAT  
601 L K D M G Y G N W I S K P Q E E K N F Y

1861 1870  
CTCTGCCCAGTA  
621 L C P V

## Plasmid-maps & sequences:

**Plasmid-map and sequence of PiggyBac plasmid SA1Q\_XLone\_Puro (pTS1086):** The cyan highlighted site denotes E>Q mutation in hyperactive SNAP ADAR (SA1Q). The PiggyBac plasmid SA1\_XLone\_Puro (pTS1074) differs from this plasmid at this site with a GAA codon (Glu) instead of CAA codon(Gln).

Created with SnapGene®

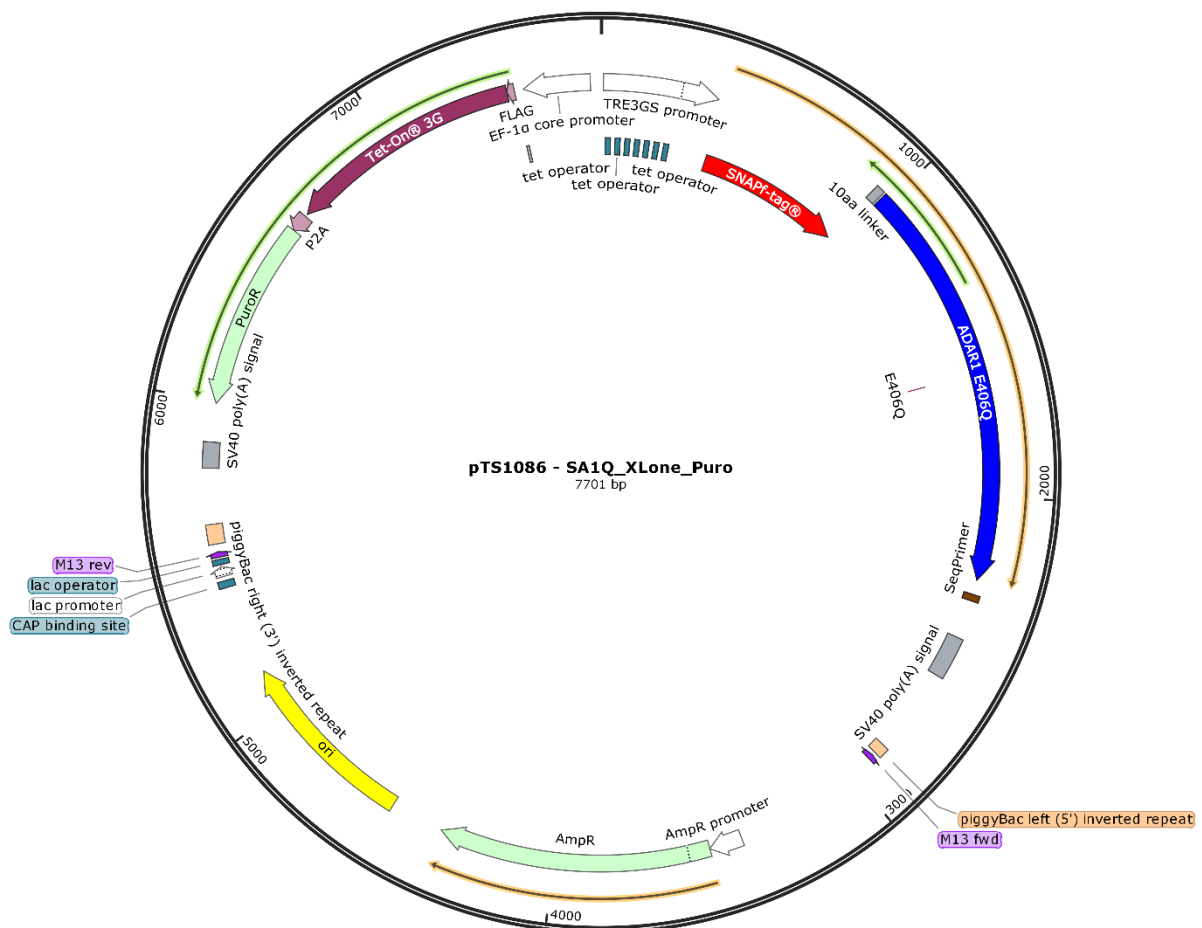

```

1      ATCACCTCGA GTTTACTCCC TATCAGTGAT AGAGAACGTA TGAAGAGTTT ACTCCCTATC
61     AGTGATAGAG AACGTATGCA GACTTTACTC  CCTATCAGTG ATAGAGAACG TATAAGGAGT
121    TTACTCCCTA TCAGTGATAG AGAACGTATG ACCAGTTTAC TCCCTATCAG TGATAGAGAA
181    CGTATCTACA GTTTACTCCC TATCAGTGAT AGAGAACGTA TATCCAGTTT ACTCCCTATC
241    AGTGATAGAG AACGTATAAG CTTTGCTTAT GTAAACCAGG GCGCCTATAA AAGAGTGCTG
301    ATTTTTTGAG TAAACTTCAA TTCCACAACA CTTTGTCTT ATACCAACTT TCCGTACCAC
361    TTCTACCCT  CGTAAAGGTA CCGCGGCCGC CACCATGGAC AAAGACTGCG AAATGAAGCG
421    CACCACCCTG GATAGCCCTC TGGGCAAGCT GGAAGTGTCT GGGTGCGAAC AGGGCCTGCA
481    CCGTATCATC TTCTGGGCA AAGGAACATC TGCCGCCGAC GCCGTGGAAG TGCCTGCCCC
541    AGCCGCCGTG CTGGGCGGAC CAGAGCCACT GATGCAGGCC ACCGCCGGC TCAACGCCTA
601    CTTTACCAG  CCTGAGGCCA TCGAGGAGTT CCCTGTGCCA GCCCTGCACC ACCCAGTGTT
661    CCAGCAGGAG AGCTTTACCC GCCAGGTGCT GTGGAAACTG CTGAAAGTGG TGAAGTTCGG
721    AGAGGTCATC AGCTACAGCC ACCTGGCCGC CCTGGCCGGC AATCCCGGC CCACCGCCGC
781    CGTAAAACC  GCCCTGAGCG GAAATCCCGT GCCCATCTG ATCCCCTGCC ACCGGGTGGT
841    GCAGGGCGAC CTGGACGTGG GGGGCTACGA GGGCGGGCTC GCCGTGAAAG AGTGGCTGCT
901    GGCCACAGAG GGCCACAGAC TGGGCAAGCC TGGGCTGGGT CCTGCAGGCG GAGGCGCGCC
  
```

|      |             |             |             |             |             |             |
|------|-------------|-------------|-------------|-------------|-------------|-------------|
| 961  | AGGGTCTGGC  | GGCGGCAGTA  | AGGCAGAACG  | CATGGGTTTC  | ACAGAGGTAA  | CCCCAGTGAC  |
| 1021 | AGGGGCCAGT  | CTCAGAAGAA  | CTATGCTCCT  | CCTCTCAAGG  | TCCCCAGAAG  | CACAGCCAAA  |
| 1081 | GACACTCCCT  | CTCACTGGCA  | GCACCTTCCA  | TGACCAGATA  | GCCATGCTGA  | GCCACCGGTG  |
| 1141 | CTTCAACACT  | CTGACTAACA  | GCTTCCAGCC  | CTCCTTGCTC  | GGCCGCAAGA  | TTCTGGCCGC  |
| 1201 | CATCATTATG  | AAAAAAGACT  | CTGAGGACAT  | GGGTGTCGTC  | GTCAGCTTGG  | GAACAGGGAA  |
| 1261 | TCGCTGTGTA  | AAAGGAGATT  | CTCTCAGCCT  | AAAAGGAGAA  | ACTGTCAATG  | ACTGCCATGC  |
| 1321 | AGAAATAATC  | TCCCGGAGAG  | GCTTCATCAG  | GTTTCTCTAC  | AGTGAGTTAA  | TGAAATACAA  |
| 1381 | CTCCCAGACT  | GCGAAGGATA  | GTATATTTGA  | ACCTGCTAAG  | GGAGGAGAAA  | AGCTCCAAAT  |
| 1441 | AAAAAAGACT  | GTGTCATTCC  | ATCTGTATAT  | CAGCACTGCT  | CCGTGTGGAG  | ATGGCGCCCT  |
| 1501 | CTTTGACCAAG | TCCTGCAGCG  | ACCGTGCTAT  | GGAAAGCACA  | GAATCCCGCC  | ACTACCCTGT  |
| 1561 | CTTCGAGAAT  | CCCAAACAAG  | GAAAGCTCCG  | CACCAAGGTG  | GAGAACGGAC  | AAAGGCACAAT |
| 1621 | CCCTGTGGAA  | TCCAGTGACA  | TTGTGCCCTAC | GTGGGATGGC  | ATTTCGGCTCG | GGGAGAGACT  |
| 1681 | CCGTACCATG  | TCCTGTAGTG  | ACAAAATCCT  | ACGCTGGAAC  | GTGCTGGGCC  | TGCAAGGGGC  |
| 1741 | ACTGTTGACC  | CACTTCCTGC  | AGCCCATTTA  | TCTCAAATCT  | GTCACATTGG  | GTTACCTTTT  |
| 1801 | CAGCCAAGGG  | CATCTGACCC  | GTGCTATTTG  | CTGTCGTGTG  | ACAAGAGATG  | GGAGTGCATT  |
| 1861 | TGAGGATGGA  | CTACGACATC  | CCTTTATTGT  | CAACCACCCC  | AAGGTTGGCA  | GAGTCAGCAT  |
| 1921 | ATATGATTCC  | AAAAGGCAAT  | CCGGGAAGAC  | TAAGGAGACA  | AGCGTCAACT  | GGTGTCTGGC  |
| 1981 | TGATGGCTAT  | GACCTGGAGA  | TCCTGGACGG  | TACCAGAGGC  | ACTGTGGATG  | GGCCACGGAA  |
| 2041 | TGAATTGTCC  | CGGGTCTCCA  | AAAAGAACAT  | TTTTCTTCTA  | TTTAAGAAGC  | TCTGCTCCTT  |
| 2101 | CCGTTACCGC  | AGGGATCTAC  | TGAGACTCTC  | CTATGGTGAG  | GCCAAGAAAAG | CTGCCCGTGA  |
| 2161 | CTACGAGACG  | GCCAAGAACT  | ACTTCAAAAA  | AGGCCTGAAG  | GATATGGGCT  | ATGGGAACTG  |
| 2221 | GATTAGCAAA  | CCCCAGGAGG  | AAAAGAACTT  | TTATCTCTGC  | CCAGTATAAA  | TCGATTCTAG  |
| 2281 | TAGACCACCT  | CCCCTGCGAG  | CTAAGCTGGA  | CAGCCAATGA  | CGGGTAAGAG  | AGTGACATTT  |
| 2341 | TTACTAACC   | TAAGACAGGA  | GGGCCGTCAG  | AGCTACTGCC  | TAATCCAAAG  | ACGGGTAAAA  |
| 2401 | GTGATAAAAA  | TGTATCACTC  | CAACCTAAGA  | CAGGCGCAGC  | TTCCGAGGGA  | TTTGAGATCC  |
| 2461 | AGACATGATA  | AGATACATTG  | ATGAGTTTGG  | ACAAACCAAA  | ACTAGAATGC  | AGTGAAAAAA  |
| 2521 | ATGCCTTATT  | TGTGAAATTT  | GTGATGCTAT  | TGCCTTATTT  | GTAACCATTA  | TAAGTGCAG   |
| 2581 | TAAACAAGTT  | TGATATCTAT  | AACAAGAAAA  | TATATATATA  | ATAAGTTATC  | ACGTAAGTAG  |
| 2641 | AACATGAAAT  | AACAATATAA  | TTATCGTATG  | AGTTAAATCT  | TAAAAGTCAC  | GTAAAAGATA  |
| 2701 | ATCATGCGTC  | ATTTTGACTC  | ACGCGGTCGT  | TATAGTTCAA  | AATCAGTGAC  | ACTTACCGCA  |
| 2761 | TTGACAAGCA  | CGCCTCACGG  | GAGCTCCAAG  | CGGCGACTGA  | GATGTCTTAA  | ATGCACAGCG  |
| 2821 | ACGGATTTCG  | GCTATTTAGA  | AAGAGAGAGC  | AATATTTCAA  | GAATGCATGC  | GTCAATTTTA  |
| 2881 | CGCAGACTAT  | CTTTCTAGGG  | TTAAGAATTC  | ACTGGCCGTC  | GTTTTACAAC  | GTCGTGACTG  |
| 2941 | GGAAAACCTT  | GGCGTTACCC  | AACTTAATCG  | CCTTGCAGCA  | CATCCCCCTT  | TCGCCAGCTG  |
| 3001 | GCGTAATAGC  | GAAGAGGCCC  | GCACCGATCG  | CCCTTCCCAA  | CAGTTGCGCA  | GCCTGAATGG  |
| 3061 | CGAATGGCGC  | CTGATGCGGT  | ATTTTCTCCT  | TACGCATCTG  | TGCGGTATTT  | CACACCGCAT  |
| 3121 | ATGGTGCACT  | CTCAGTACAA  | TCTGCTCTGA  | TGCCGCATAG  | TTAAGCCAGC  | CCCACACCC   |
| 3181 | GCCAACACCC  | GCTGACGCGC  | CCTGACGGGC  | TTGTCTGCTC  | CCGGCATCCG  | CTTACAGACA  |
| 3241 | AGCTGTGACC  | GTCTCCGGGA  | GCTGCATGTG  | TCAGAGGTTT  | TCACCCTCAT  | CACCGAAACG  |
| 3301 | CGCGAGACGA  | AAGGGCCTCG  | TGATACGCCCT | ATTTTTATAG  | GTTAATGTCA  | TGATAATAAT  |
| 3361 | GGTTTCTTAG  | ACGTCAGGTG  | GCACCTTTTCG | GGGAAATGTG  | CGCGGAACCC  | CTATTTGTTT  |
| 3421 | ATTTTTCTAA  | ATACATTCAA  | ATATGTATCC  | GCTCATGAGA  | CAATAACCCCT | GATAAATGCT  |
| 3481 | TCATAATAT   | TGAAAAAGGA  | AGAGTATGAG  | TATTC AACAT | TTCCGTGTCG  | CCCTTATTCC  |
| 3541 | CTTTTTTGCG  | GCATTTTGCC  | TTCTGTTTT   | TGCTCACCCA  | GAAACGCTGG  | TGAAAGTAAA  |
| 3601 | AGATGCTGAA  | GATCAGTTGG  | GTGCACGAGT  | GGTTACATC   | GAACTGGATC  | TCAACAGCGG  |
| 3661 | TAAGATCCCT  | GAGAGTTTTC  | GCCCCAAGA   | ACGTTTTCCA  | ATGATGAGCA  | CTTTTAAAGT  |
| 3721 | TCTGCTATGT  | GGCGCGGTAT  | TATCCCCTAT  | TGACGCCGGG  | CAAGAGCAAC  | TCGGTCGCCG  |
| 3781 | CATACACTAT  | TCTCAGAAATG | ACTTGTTTGA  | GTA CTACCA  | GTCACAGAAA  | AGCATCTTAC  |
| 3841 | GGATGGCATG  | ACAGTAAGAG  | AATTATGCAG  | TGCTGCCATA  | ACCATGAGTG  | ATAACACTGC  |
| 3901 | GGCCAACCTA  | CTTCTGACAA  | CGATCGGAGG  | ACCGAAGGAG  | CTAACCGCTT  | TTTTGCACAA  |
| 3961 | CATGGGGGAT  | CATGTAATC   | GCCTTGATCG  | TTGGGAACCG  | GAGCTGAATG  | AAGCCATACC  |
| 4021 | AAACGACGAG  | CGTGACACCA  | CGATGCCTGT  | AGCAATGGCA  | ACAACGTTGC  | GCAAAC TATT |
| 4081 | AACTGGCGAA  | CTACTTACTC  | TAGCTTCCCG  | GCAACAATTA  | ATAGACTGGA  | TGGAGGCGGA  |
| 4141 | TAAAGTTGCA  | GGACCACTTC  | TGCGCTCGGC  | CCTTCCGGCT  | GGCTGGTTTA  | TTGCTGATAA  |
| 4201 | ATCTGGAGCC  | GGTGAGCGTG  | GGTCTCGCGG  | TATCATTGCA  | GCACTGGGGC  | CAGATGGTAA  |
| 4261 | GCCCTCCCGT  | ATCGTAGTTA  | TCTACACGAC  | GGGGAGTCAG  | GCAACTATGG  | ATGAACGAAA  |
| 4321 | TAGACAGATC  | GCTGAGATAG  | GTGCCCTCACT | GATTAAGCAT  | TGGTAACTGT  | CAGACCAAGT  |
| 4381 | TTACTCATAT  | ATACTTTAGA  | TTGATTTAAA  | ACTTCATTTT  | TAATTTAAAA  | GGATCTAGGT  |
| 4441 | GAAGATCCTT  | TTTGATAATC  | TCATGACCAA  | AATCCCCTAA  | CGTGAGTTTT  | CGTTCCACTG  |
| 4501 | AGCGTCAGAC  | CCCGTAGAAA  | AGATCAAAGG  | ATCTTCTTGA  | GATCCTTTTT  | TTCTGCGCGT  |
| 4561 | AATCTGCTGC  | TTGCAAACAA  | AAAAACCACC  | GCTACCAGCG  | GTGGTTTGT   | TGCCGGATCA  |



|      |            |             |             |            |             |             |
|------|------------|-------------|-------------|------------|-------------|-------------|
| 4621 | AGAGCTACCA | ACTCTTTTTTC | CGAAGGTAAC  | TGGCTTCAGC | AGAGCGCAGA  | TACCAAATAC  |
| 4681 | TGTTCTTCTA | GTGTAGCCGT  | AGTTAGGCCA  | CCACTTCAAG | AACTCTGTAG  | CACCGCCTAC  |
| 4741 | ATACCTCGCT | CTGCTAATCC  | TGTTACCAGT  | GGCTGCTGCC | AGTGGCGATA  | AGTCGTGTCT  |
| 4801 | TACCGGGTTG | GACTCAAGAC  | GATAGTTACC  | GGATAAGGCG | CAGCGGTCCG  | GCTGAACGGG  |
| 4861 | GGGTTCGTGC | ACACAGCCCA  | GCTTGGAGCG  | AACGACCTAC | ACCGAACTGA  | GATACCTACA  |
| 4921 | GCGTGAGCTA | TGAGAAAAGCG | CCACGCTTCC  | CGAAGGGAGA | AAGGCGGACA  | GGTATCCGGT  |
| 4981 | AAGCGGCAGG | GTCGGAACAG  | GAGAGCGCAC  | GAGGGAGCTT | CCAGGGGGAA  | ACGCCTGGTA  |
| 5041 | TCTTTATAGT | CCTGTCCGGT  | TTCGCCACCT  | CTGACTTGAG | CGTCGATTTT  | TGTGATGCTC  |
| 5101 | GTCAGGGGGG | CGGAGCCTAT  | GGAAAAACGC  | CAGCAACGCG | GCCTTTTTTAC | GGTTCCTGGC  |
| 5161 | CTTTTGCTGG | CCTTTTGCTC  | ACATGTCTTT  | TCCTGCGTTA | TCCCCTGATT  | CTGTGGATAA  |
| 5221 | CCGTATTACC | GCCTTTGAGT  | GAGCTGATAC  | CGCTCGCCGC | AGCCGAACGA  | CCGAGCGCAG  |
| 5281 | CGAGTCAGTG | AGCGAGGAAG  | CGGAAGAGCG  | CCCAATACGC | AAACCGCCTC  | TCCCCGCGCG  |
| 5341 | TTGGCCGATT | CATTAATGCA  | GCTGGCACGA  | CAGGTTTCCC | GACTGGAAAG  | CGGGCAGTGA  |
| 5401 | GCGCAACGCA | ATTAATGTGA  | GTTAGCTCAC  | TCATTAGGCA | CCCCAGGCTT  | TACACTTTAT  |
| 5461 | GCTTCCGGCT | CGTATGTTGT  | GTGGAATTGT  | GAGCGGATAA | CAATTTCCACA | CAGGAAACAG  |
| 5521 | CTATGACCAT | GATTACGCCA  | AGGTCGACTT  | AACCCTAGAA | AGATAATCAT  | ATTGTGACGT  |
| 5581 | ACGTTAAAGA | TAATCATGCG  | TAAAATTGAC  | GCATGTGTTT | TATCGGTCTG  | TATATCGAGG  |
| 5641 | TTTATTTATT | AATTTGAATA  | GATATTAAGT  | TTTATTATAT | TTACTACTTAC | ATACTAATAA  |
| 5701 | TAAATTCAAC | AAACAATTTA  | TTTATGTTTA  | TTTATTTATT | AAAAAAAAAAC | AAAAACTCAA  |
| 5761 | AATTTCTTCT | ATAAAGTAAC  | AAAACTTTTA  | GCAGTGAAAA | AAATGCTTTA  | TTTGTGAAAT  |
| 5821 | TTGTGATGCT | ATTGCTTTAT  | TTGTAACCAT  | TATAAGCTGC | AATAAACAAAG | TTAACAACAA  |
| 5881 | CAATTGCATT | CATTTTATGT  | TTCAGGTTCA  | GGGGGAGGTG | TGGGAGGTTT  | TTTAAAGCAA  |
| 5941 | GTAAAACCTC | TACAAAATGTG | GTATGGCTGA  | TTATGATCCT | CTGGAGATCC  | TAGGCTAGGC  |
| 6001 | ACCGGGCTTG | CGGGTCATGC  | ACCAGGTGCG  | CGGTCCCTCG | GGCACCTCGA  | CGTCGGCGGT  |
| 6061 | GACGGTGAAG | CCGAGCCGCT  | CGTAGAAGGG  | GAGGTTGCGG | GGCGCGGAGG  | TCGCCAGGAA  |
| 6121 | GGCGGGCACC | CCGGCGCGCT  | CGGCCGCCTC  | CACTCCGGGG | AGCACGACGG  | CGCTGCCACT  |
| 6181 | ACCTTTGCC  | TGGTGGTCCG  | GCGAGACGCC  | GACGGTGGCC | AGGAACCACG  | CGGGACCTCT  |
| 6241 | GGCCCGGTGC | GGCCCCAGGA  | GGCCTCCAT   | CTGTTGCTGC | GCGGCAGACC  | GGGAACCGCT  |
| 6301 | CAACTCGGCC | ATGCGCGGGC  | CGATCTCGGC  | GAACACCGCC | CCCGCTTCGA  | CGCTCTCCGG  |
| 6361 | CGTGGTCCAG | ACCGCCACCG  | CGGCGCCGTC  | GTCCGCGACC | CACACCTTGC  | CGATGTGCGAG |
| 6421 | CCCACGCGC  | GTGAGGAAGA  | GTTCTTGCAG  | CTCGGTGACC | CGCTCGATGT  | GGCGGTCCGG  |
| 6481 | ATCGACGGTG | TGGCGCGTGG  | CGGGGTAGTC  | GGCGAACGCG | GCGGCGAGGG  | TGCGTACGGC  |
| 6541 | CCTGGGGACG | TCGTGCGGGG  | TGGCGAGGCG  | CACCGTGGGC | TTGTACTCGG  | TCATGGGGCC  |
| 6601 | GGGGTTCTCC | TCCACGTGCG  | CGGCCTGCTT  | CAGCAGGCTG | AAGTTGGTGG  | CGCCGCTGCC  |
| 6661 | CCCGGGGAGC | ATGTCAAGGT  | CAAAATCGTC  | AAGAGCGTCA | GCAGGCAGCA  | TATCAAGGTC  |
| 6721 | AAAGTCGTCA | AGGGCATCGG  | CTGGGAGCAT  | GTCTAAGTCA | AAATCGTCAA  | GGGCGTCCGT  |
| 6781 | CGGCCCGCCG | CTTTTGCACT  | TTAGCTGTTT  | CTCCAGGCCA | CATATGATTA  | GTTCCAGGCC  |
| 6841 | GAAAAGGAAG | GCAGGTTCCG  | CTCCCTGCCG  | GTGGAACAGC | TCAATTGCTT  | GTTTCAGAAG  |
| 6901 | TGGGGGCATA | GAATCGGTGG  | TAGGTGTCTC  | TCTTTCTCT  | TTTGCTACTT  | GATGCTCCTG  |
| 6961 | TTCTTCCAAT | ACGCAGCCCA  | GTGTAAAAGTG | GCCCACGGCG | GACAGAGCGT  | ACAGTGCGTT  |
| 7021 | CTCCAGGGAG | AAGCCTTGCT  | GACACAGGAA  | CGCGAGCTGA | TTTTCAGGG   | TTTCGTACTG  |
| 7081 | TTTCTCTGTT | GGGCGGGTGC  | CGAGATGCAC  | TTTAGCCCCG | TCGCGATGTG  | AGAGGAGAGC  |
| 7141 | ACAGCGGTAT | GACTTGGCGT  | TGTTCCGCAG  | AAAGTCTTGC | CATGACTCGC  | CTTCCAGGGG  |
| 7201 | GCAGGAGTGG | GTATGATGCC  | TGTCAGCAT   | CTCGATTGGC | AGGGCATCGA  | GCAGGGCCCC  |
| 7261 | CTTGTTCTTC | ACGTGCCAGT  | ACAGGGTAGG  | CTGCTCAACT | CCCAGCTTTT  | GAGCGAGTTT  |
| 7321 | CCTTGTCGTC | AGGCCTTCGA  | TACCGACTCC  | ATTGAGTAAT | TCCAGAGCAG  | AGTTTATGAC  |
| 7381 | TTTGCTCTTG | TCCAGTCTAG  | ACATCTTATC  | GTCATCGTCT | TTGTAATCCA  | TGGTGGCGGA  |
| 7441 | TCCCGCGTCA | CGACACCTGT  | GTTCTGGCGG  | CAAACCCGTT | GCGAAAAAGA  | ACGTTACCGG  |
| 7501 | CGACTACTGC | ACTTATATAC  | GGTTCTCCCC  | CACCCTCGGG | AAAAAGGCGG  | AGCCAGTACA  |
| 7561 | CGACATCACT | TTCCAGTTT   | ACCCCGCGCC  | ACCTTCTCTA | GGCACCGGTT  | CAATTGCCGA  |
| 7621 | CCCCTCCCC  | CAACTTCTCG  | GGGACTGTGG  | GCGATGTGCG | CTCTGCCAC   | TGACGGGCAC  |
| 7681 | CGGAGCCACT | CGAGTGGAAT  | T           |            |             |             |

**Plasmid-map and sequence of PiggyBac plasmid SA1Q\_XLone\_BSD (pTS1018):** The cyan highlighted site denotes E>Q mutation in hyperactive SNAP ADAR (SA1Q). The PiggyBac plasmid SA1\_XLone\_BSD (pTS990) differs from this plasmid at this site with a GAA codon (Glu) instead of CAA codon (Gln).

Created with SnapGene®

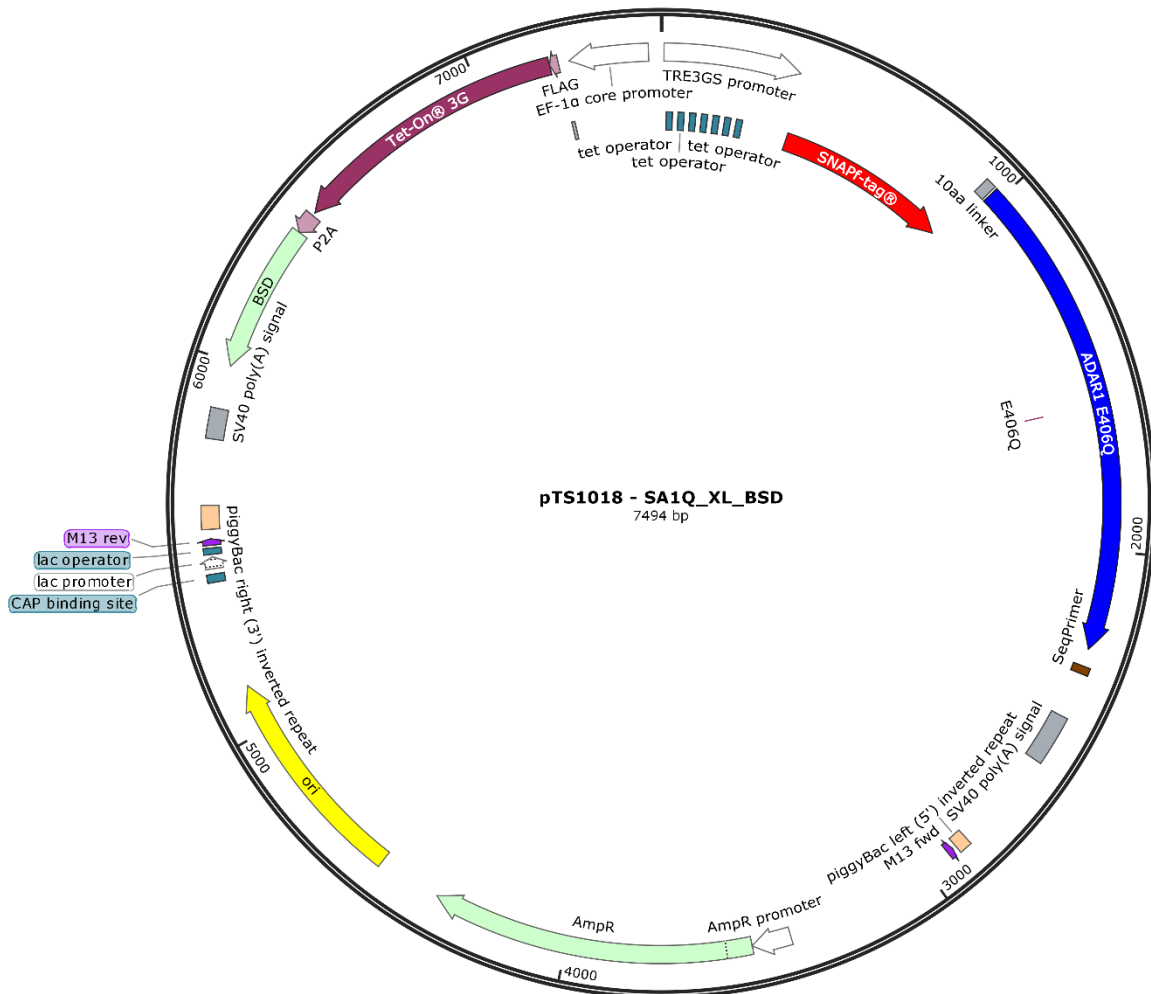

```

1      ATCACCTCGA  GTTTACTCCC  TATCAGTGAT  AGAGAACGTA  TGAAGAGTTT  ACTCCCTATC
61     AGTGATAGAG  AACGTATGCA  GACTTTACTC  CCTATCAGTG  ATAGAGAACG  TATAAGGAGT
121    TTACTCCCTA  TCAGTGATAG  AGAACGTATG  ACCAGTTTAC  TCCCTATCAG  TGATAGAGAA
181    CGTATCTACA  GTTTACTCCC  TATCAGTGAT  AGAGAACGTA  TATCCAGTTT  ACTCCCTATC
241    AGTGATAGAG  AACGTATAAG  CTTTGCTTAT  GTAAACCAGG  GCGCCTATAA  AAGAGTGCTG
301    ATTTTTTGAG  TAAACTTCAA  TTCCACAACA  CTTTTGTCTT  ATACCAACTT  TCCGTACCAC
361    TTCCTACCCT  CGTAAAGGTA  CCGCGGCCGC  CACCATGGAC  AAAGACTGCG  AAATGAAGCG
421    CACCACCCTG  GATAGCCCTC  TGGCAAGCT  GGAAGTGTCT  GGGTGCGAAC  AGGCCCTGCA
481    CCGTATCATC  TTCCTGGGCA  AAGGAACATC  TGCCGCCGAC  GCCTGGAAG  TGCCTGCCCC
541    AGCCGCCGTG  CTGGGCGGAC  CAGAGCCACT  GATGCAGGCC  ACCGCCTGGC  TCAACGCCTA
601    CTTTACCAG  CCTGAGGCCA  TCGAGGAGTT  CCCTGTGCCA  GCCCTGCACC  ACCCAGTGTT
661    CCAGCAGGAG  AGCTTTACCC  GCCAGGTGCT  GTGGAAACTG  CTGAAAGTGG  TGAAGTTCGG
721    AGAGGTCATC  AGCTACAGCC  ACCTGGCCGC  CCTGGCCGGC  AATCCC GCCG  CCACCGCCGC
781    CGTGAAAACC  GCCCTGAGCG  GAAATCCCGT  GCCCATTTCT  ATCCCCTGCC  ACCGGGTGGT
841    GCAGGGCGAC  CTGGACGTGG  GGGGCTACGA  GGGCGGGCTC  GCCGTGAAAG  AGTGGCTGCT
901    GGCCACAGAC  GGCCACAGAC  TGGCAAGCC  TGGGCTGGGT  CCTGCAGGCG  GAGGCGGCC
  
```

961 AGGGTCTGGC GCGGCAGTA AGGCAGAACG CATGGGTTTC ACAGAGGTAA CCCCAGTGAC  
1021 AGGGGCCAGT CTCAGAAGAA CTATGCTCCT CCTCTCAAGG TCCCCAGAAG CACAGCCAAA  
1081 GACACTCCCT CTCACTGGCA GCACCTTCCA TGACCAGATA GCCATGCTGA GCCACCGGTG  
1141 CTTCAACACT CTGACTAACA GCTTCCAGCC CTCCTTGCTC GGCCGCAAGA TTCTGGCCGC  
1201 CATCATTATG AAAAAAGACT CTGAGGACAT GGGTGTGTCGTC GTCAGCTTGG GAACAGGGAA  
1261 TCGCTGTGTA AAAGGAGATT CTCTCAGCCT AAAAGGAGAA ACTGTCAATG ACTGCCATGC  
1321 AGAAATAATC TCCCGGAGAG GCTTCATCAG GTTCTCTAC AGTGAGTTAA TGAAATACAA  
1381 CTCCCAGACT GCGAAGGATA GTATATTTGA ACCTGCTAAG GGAGGAGAAA AGCTCCAAAT  
1441 AAAAAAGACT GTGTCATTCC ATCTGTATAT CAGCACTGCT CCGTGTGGAG ATGGCGCCCT  
1501 CTTTGACAAG TCCTGCAGCG ACCGTGCTAT GGAAAGCACA GAATCCCGCC ACTACCCTGT  
1561 CTTTCGAGAAT CCCAAACAAG GAAAGCTCCG CACCAAGGTG GAGAACGGAC AAGGCACAAT  
1621 CCCTGTGGAA TCCAGTGACA TTGTGCCTAC GTGGGATGGC ATTCGGCTCG GGGAGAGACT  
1681 CCGTACCATG TCCTGTAGTG ACAAAAATCCT ACGCTGGAAC GTGCTGGGCC TGCAAGGGGC  
1741 ACTGTTGACC CACTTCCTGC AGCCCATTTA TCTCAAATCT GTCACATTGG GTTACCTTTT  
1801 CAGCCAAGGG CATCTGACCC GTGCTATTTG CTGTCGTGTG ACAAGAGATG GGAGTGCATT  
1861 TGAGGATGGA CTACGACATC CCTTTATTGT CAACCACCCC AAGGTTGGCA GAGTCAGCAT  
1921 ATATGATTCC AAAAGGCAAT CCGGGAAGAC TAAGGAGACA AGCGTCAACT GGTGTCTGGC  
1981 TGATGGCTAT GACCTGGAGA TCCTGGACGG TACCAGAGGC ACTGTGGATG GGCCACGGAA  
2041 TGAATTGTCC CGGGTCTCCA AAAAGAACAT TTTTCTTCTA TTTAAGAAGC TCTGCTCCTT  
2101 CCGTTACCGC AGGGATCTAC TGAGACTCTC CTATGGTGAG GCCAAGAAAG CTGCCCGTGA  
2161 CTACGAGACG GCCAAGAACT ACTTCAAAAA AGGCCTGAAG GATATGGGCT ATGGGAAGCTG  
2221 GATTAGCAAA CCCCAGGAGG AAAAGAACTT TTATCTCTGC CCAGTATAAA TCGATTCTAG  
2281 TAGACCACCT CCCCTGCGAG CTAAGCTGGA CAGCCAATGA CGGGTAAGAG AGTGACATTT  
2341 TTCACTAACC TAAGACAGGA GGGCCGTCAG AGCTACTGCC TAATCCAAAG ACGGGTAAAA  
2401 GTGATAAAAA TGTATCACTC CAACCTAAGA CAGGCGCAGC TTCCGAGGGA TTTGAGATCC  
2461 AGACATGATA AGATACATTG ATGAGTTTGG ACAAACCAA ACTAGAATGC AGTGAAAAAA  
2521 ATGCCTTATT TGTGAAATTT GTGATGCTAT TGCCTTATTT GTAACCATTA TAAGTGCAA  
2581 TAAACAAGTT TGATATCTAT AACAGAAAA TATATATATA ATAAGTTATC ACGTAAAGTAG  
2641 AACATGAAAT AACAAATATA TTATCGTATG AGTTAAATCT TAAAAGTCAC GTAAAAGATA  
2701 ATCATGCGTC ATTTTGACTC ACGCGGTCGT TATAGTTCAA AATCAGTGAC ACTTACCGCA  
2761 TTGACAAGCA CGCCTCACGG GAGCTCCAAG CGGCGACTGA GATGTCTTAA ATGCACAGCG  
2821 ACGGATTCGC GCTATTTAGA AAGAGAGAGC AATATTTCAA GAATGCATGC GTCAATTTTA  
2881 CGCAGACTAT CTTTCTAGGG TTAAGAATTC ACTGGCCGTC GTTTTACAAC GTCGTGACTG  
2941 GGAAAACCTT GCGGTTACCC AACTTAATCG CCTTGCAGCA CATCCCCCTT TCGCCAGCTG  
3001 GCGTAATAGC GAAGAGGCC GCACCGATCG CCCTTCCCAA CAGTTGCGCA GCCTGAATGG  
3061 CGAATGGCGC CTGATGCGGT ATTTTCTCCT TACGCATCTG TGCGGTATTT CACACCGCAT  
3121 ATGGTGC ACT CTCAGTACAA TCTGCTCTGA TGCCGCATAG TTAAGCCAGC CCCGACACCC  
3181 GCCAACACCC GCTGACGCGC CCTGACGGGC TTGTCTGCTC CCGGCATCCG CTTACAGACA  
3241 AGCTGTGACC GTCTCCGGGA GCTGCATGTG TCAGAGGTTT TCACCCTCAT CACCGAAACG  
3301 CGCGAGACGA AAGGGCCTCG TGATACGCCCT ATTTTATAG GTTAATGTCA TGATAATAAT  
3361 GGTTTCTTAG ACGTCAGGTG GCACTTTTCG GGGAAATGTG CGCGGAACCC CTATTTGTTT  
3421 ATTTTCTAA ATACATTCAA ATATGTATCC GCTCATGAGA CAATAACCCCT GATAAATGCT  
3481 TCAATAATAT TGAAAAAGGA AGAGTATGAG TATTC AACAT TTCCGTGTCG CCCTTATTC  
3541 CTTTTTTGCG GCATTTTGCC TTCTGTTTT TGCTCACCCA GAAACGCTGG TGAAAGTAAA  
3601 AGATGCTGAA GATCAGTTGG GTGCAGAGT GGGTTACATC GAACTGGATC TCAACAGCGG  
3661 TAAGATCCTT GAGAGTTTTT GCCCCGAAGA ACGTTTTCCA ATGATGAGCA CTTTTAAAGT  
3721 TCTGCTATGT GGCGCGGTAT TATCCCCTAT TGACGCCGGG CAAGAGCAAC TCGGTCGCCG  
3781 CATACTACTAT TCTCAGAAATG ACTTGGTTGA GTACTACCA GTCACAGAAA AGCATCTTAC  
3841 GGATGGCATG ACAGTAAGAG AATTATGCAG TGCTGCCATA ACCATGAGTG ATAACACTGC  
3901 GGCCAACTTA CTTCTGACAA CGATCGGAGG ACCGAAGGAG CTAACCGCTT TTTTGCACAA  
3961 CATGGGGGAT CATGTAATC GCCTTGATCG TTGGGAACCG GAGCTGAATG AAGCCATACC  
4021 AAACGACGAG CGTGACACCA CGATGCCTGT AGCAATGGCA ACAACGTTGC GCAAATATT  
4081 AACTGGCGAA CTACTTACTC TAGCTTCCCG GCAACAATTA ATAGACTGGA TGGAGGCGGA  
4141 TAAAGTTGCA GGACCACTTC TGCGCTCGGC CCTTCCGGCT GGCTGGTTTA TTGCTGATAA  
4201 ATCTGGAGCC GGTGAGCGTG GGTCTCGCGG TATCATGCA GCACTGGGGC CAGATGGTAA  
4261 GCCCTCCCGT ATCGTAGTTA TCTACACGAC GGGGAGTCAG GCAACTATGG ATGAACGAAA  
4321 TAGACAGATC GCTGAGATAG GTGCCCTCACT GATTAAGCAT TGGTAACTGT CAGACCAAGT  
4381 TTA CTATAT AACTTTTAGA TTGATTTAAA ACTTCATTTT TAATTTAAAA GGATCTAGGT  
4441 GAAGATCCTT TTTGATAATC TCATGACCAA AATCCCCTAA CGTGAGTTTT CGTTCCACTG  
4501 AGCGTCAGAC CCCGTAGAAA AGATCAAAGG ATCTTCTTGA GATCCTTTTT TTCTGCGCGT  
4561 AATCTGCTGC TTGCAAACAA AAAAAACCACC GCTACCAGCG GTGGTTTGT TGGCCGATCA

|      |            |             |            |             |             |             |
|------|------------|-------------|------------|-------------|-------------|-------------|
| 4621 | AGAGCTACCA | ACTCTTTTTTC | CGAAGGTAAC | TGGCTTCAGC  | AGAGCGCAGA  | TACCAAATAC  |
| 4681 | TGTTCTTCTA | GTGTAGCCGT  | AGTTAGGCCA | CCACTTCAAG  | AACTCTGTAG  | CACCGCCTAC  |
| 4741 | ATACCTCGCT | CTGCTAATCC  | TGTTACCAGT | GGCTGCTGCC  | AGTGGCGATA  | AGTCGTGTCT  |
| 4801 | TACCGGGTTG | GACTCAAGAC  | GATAGTTACC | GGATAAGGCG  | CAGCGGTCCG  | GCTGAACGGG  |
| 4861 | GGGTTCGTGC | ACACAGCCCA  | GCTTGGAGCG | AACGACCTAC  | ACCGAACTGA  | GATACCTACA  |
| 4921 | GCGTGAGCTA | TGAGAAAAGCG | CCACGCTTCC | CGAAGGGAGA  | AAGGCGGACA  | GGTATCCGGT  |
| 4981 | AAGCGGCAGG | GTCGGAACAG  | GAGAGCGCAC | GAGGGAGCTT  | CCAGGGGGAA  | ACGCCTGGTA  |
| 5041 | TCTTTATAGT | CCTGTCGGGT  | TTCGCCACCT | CTGACTTGAG  | CGTCGATTTT  | TGTGATGCTC  |
| 5101 | GTCAGGGGGG | CGGAGCCTAT  | GGAAAAACGC | CAGCAACGCG  | GCCTTTTTTAC | GGTTCCTGGC  |
| 5161 | CCTTTGCTGG | CCTTTTGCTC  | ACATGTCTTT | TCCTGCGTTA  | TCCCCTGATT  | CTGTGGATAA  |
| 5221 | CCGTATTACC | GCCTTTGAGT  | GAGCTGATAC | CGCTCGCCGC  | AGCCGAACGA  | CCGAGCGCAG  |
| 5281 | CGAGTCAGTG | AGCGAGGAAG  | CGGAAGAGCG | CCCAATACGC  | AAACCGCCTC  | TCCCCGCGCG  |
| 5341 | TTGGCCGATT | CATTAATGCA  | GCTGGCACGA | CAGGTTTCCC  | GACTGGAAAG  | CGGGCAGTGA  |
| 5401 | GCGCAACGCA | ATTAATGTGA  | GTTAGCTCAC | TCATTAGGCA  | CCCCAGGCTT  | TACACTTTAT  |
| 5461 | GCTTCCGGCT | CGTATGTTGT  | GTGGAATTGT | GAGCGGATAA  | CAATTTCCACA | CAGGAAACAG  |
| 5521 | CTATGACCAT | GATTACGCCA  | AGGTCGACTT | AACCCTAGAA  | AGATAATCAT  | ATTGTGACGT  |
| 5581 | ACGTTAAAGA | TAATCATGCG  | TAAAATTGAC | GCATGTGTTT  | TATCGGTCTG  | TATATCGAGG  |
| 5641 | TTTATTTATT | AATTTGAATA  | GATATTAAGT | TTTATTATAT  | TTACTACTTAC | ATACTAATAA  |
| 5701 | TAAATTCAAC | AAACAATTTA  | TTTATGTTTA | TTTATTTATT  | AAAAAAAAAAC | AAAAACTCAA  |
| 5761 | AATTTCTTCT | ATAAAGTAAC  | AAAACTTTTA | GCAGTGAAAA  | AAATGCTTTA  | TTTGTGAAAT  |
| 5821 | TTGTGATGCT | ATTGCTTTAT  | TTGTAACCAT | TATAAGCTGC  | AATAAACAAAG | TTAACAACAA  |
| 5881 | CAATTGCATT | CATTTTATGT  | TTCAGGTTCA | GGGGGAGGTG  | TGGGAGGTTT  | TTTAAAGCAA  |
| 5941 | GTAAAACCTC | TACAAAATGTG | GTATGGCTGA | TTATGATCCT  | CTGGAGATTT  | AGCCCTCCCA  |
| 6001 | CACATAACCA | GAGGGCAGCA  | ATTCACGAAT | CCCAACTGCC  | GTCGGCTGTC  | CATCACTGTC  |
| 6061 | CTTCACTATG | GCTTTGATCC  | CAGGATGCAG | ATCGAGAAGC  | ACCTGTCCGG  | ACCGTCCGCA  |
| 6121 | GGGGCTCAAG | ATGCCCTGT   | TCTCATTTCC | GATCGCGACG  | ATACAAGTCA  | GGTTGCCCAG  |
| 6181 | TGCCCGACGA | GCAGCAGTGC  | CCAGCACCAC | GAGTTCTGCA  | CAAGGTCCCC  | CAGTAAAAATG |
| 6241 | ATATACATTG | ACACCAGTGA  | AGATCGGGCC | GTGCTAGAG   | AGAGCTGCGC  | TGGCGACGCT  |
| 6301 | GTAGTCTTCA | GAGATGGGGA  | TGCTGTTGAT | TGTAGCCGTT  | GCTCTTTCAA  | TGAGGGTGGGA |
| 6361 | TTCTTCTTGA | GACAAAAGGCT | TGGCCATGGG | GCCGGGGTTC  | TCTTCCACGT  | CGCCGGCCTG  |
| 6421 | CTTCAGCAGG | CTGAAGTTGG  | TGGCGCCGCT | GCCCCGGGG   | AGCATGTCAA  | GGTCAAAATC  |
| 6481 | GTCAAGAGCG | TCAGCAGGCA  | GCATATCAAG | GTCAAAGTCG  | TCAAGGGCAT  | CGGCTGGGAG  |
| 6541 | CATGTCTAAG | TCAAAAATCGT | CAAGGGCGTC | GGTCCGGCCC  | CCGCTTTCGC  | ACTTTAGCTG  |
| 6601 | TTTCTCCAGG | CCACATATGA  | TTAGTTCCAG | GCCGAAAAGG  | AAGGCAGGTT  | CGGCTCCCTG  |
| 6661 | CCGGTCGAAC | AGCTCAATTG  | CTTGTTCAG  | AAGTGGGGGC  | ATAGAATCGG  | TGGTAGGTGT  |
| 6721 | CTCTCTTTCC | TCTTTTGCTA  | CTTGATGCTC | CTGTTCCCTC  | AATACGCAGC  | CCAGTGTAAT  |
| 6781 | GTGGCCCACG | GCGGACAGAG  | CGTACAGTGC | GTTCCTCAGG  | GAGAAGCCTT  | GCTGACACAG  |
| 6841 | GAACGCGAGC | TGATTTTCCA  | GGGTTTCGTA | CTGTTTCTCT  | GTTGGGCGGG  | TGCCGAGATG  |
| 6901 | CACTTTAGCC | CCGTCGCGAT  | GTGAGAGGAG | AGCACAGCGG  | TATGACTTGG  | CGTTGTTCCG  |
| 6961 | CAGAAAGTCT | TGCCATGACT  | CGCCTTCCAG | GGGGCAGGAG  | TGGGTATGAT  | GCCTGTCCAG  |
| 7021 | CATCTCGATT | GGCAGGGCAT  | CGAGCAGGGC | CCGCTTGTTT  | TTCACGTGCC  | AGTACAGGGT  |
| 7081 | AGGCTGCTCA | ACTCCAGCT   | TTTGAGCGAG | TTTCCCTTGTC | GTCAGGCCCTT | CGATACCGAC  |
| 7141 | TCCATTGAGT | AATTCCAGAG  | CAGAGTTTAT | GACTTTGCTC  | TTGTCCAGTC  | TAGACATCTT  |
| 7201 | ATCGTCATCG | TCTTTGTAAT  | CCATGGTGGC | GGATCCC GCG | TCACGACACC  | TGTGTTCTGG  |
| 7261 | CGGCAAACCC | GTTGCGAAAA  | AGAACGTTCA | CGGCGACTAC  | TGCACTTATA  | TACGGTCTCT  |
| 7321 | CCCCACCCTC | GGGAAAAAGG  | CGGAGCCAGT | ACACGACATC  | ACTTTCCCAG  | TTTACCCCGC  |
| 7381 | GCCACCTTCT | CTAGGCACCG  | GTTCAATTGC | CGACCCCTCC  | CCCCAACTTC  | TCGGGGACTG  |
| 7441 | TGGGCGATGT | GCGCTCTGCC  | CACTGACGGG | CACCGGAGCC  | ACTCGAGTGG  | AATT        |

## Plasmid-map and sequence of SNAP AdV SA1Q, minimal CMV (pTS2396):

Alias: pTS2396

Created with SnapGene®

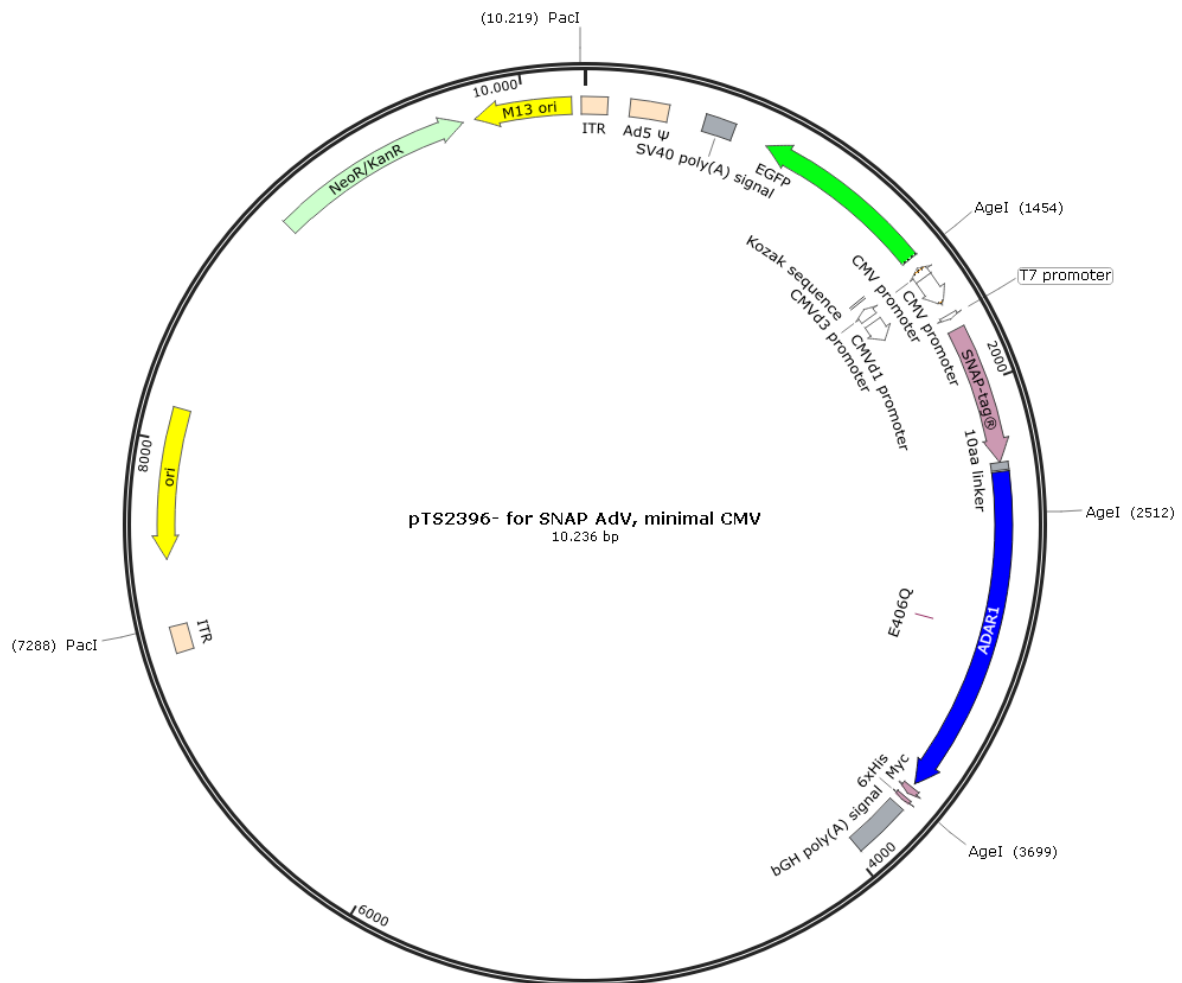

```

1      TACCTTATTT TGGATTGAAG CCAATATGAT AATGAGGGGG TGGAGTTTGT GACGTGGCGC
61     GGGGCGTGGG AACGGGGCGG GTGACGTAGT AGTGTGGCGG AAGTGTGATG TTGCAAGTGT
121    GGCGGAACAC ATGTAAGCGA CGGATGTGGC AAAAGTGACG TTTTGTGGTGT GCGCCGGTGT
181    ACACAGGAAG TGACAATTTT CGCGCGGTTT TAGGCGGATG TTGTAGTAAA TTTGGGCGTA
241    ACCGAGTAAG ATTTGGCCAT TTTTCGCGGA AAACCTGAATA AGAGGAAGTG AAATCTGAAT
301    AATTTTGTGT TACTCATAGC GCGTAATATT TGTCTAGGGC CGCGGGGACT TTGACCGTTT
361    ACGTGGAGAC TCGCCCAGGT GTTTTTCTCA GGTGTTTTCC GCGTTCGGGG TCAAAGTTGG
421    CGTTTTATTA TTATAGTCAG TCGAGTCTAG CAAGCTAGCT TGATCGCGTT AAGATACATT
481    GATGAGTTTG GACAAACCAC AACTAGAATG CAGTGAAAAA AATGC TTAT TTGTGAAATT
541    TGTGATGCTA TTGCTTTATT TGTAACCATT ATAAGCTGCA ATAAACAAGT TAACAACAAC
601    AATTGCATTC ATTTTATGTT TCAGGTCAG GGGGAGGTGT GGGAGGTTTT TTAAAGCAAG
661    TAAAACCTCT ACAAATGTGG TATGGCTGAT TATGATCAGT TATCTAGATC CGGTGGATCT
721    GAGTCCGGAC TTGTACAGCT CGTCCATGCC GAGAGTGATC CCGGCGGCGG TCACGAACTC
781    CAGCAGGACC ATGTGATCGC GCTTCTCGTT GGGGTCTTTG CTCAGGGCGG ACTGGGTGCT
841    CAGGTAGTGG TTGTCGGGCA GCAGCACGGG GCCGTCGCCG ATGGGGGTGT TCTGCTGGTA
901    GTGGTCGGCG AGCTGCACGC TGCCGTCCTC GATGTTGTGG CGGATCTTGA AGTTCACCTT
961    GATGCCGTTT TTCTGCTTGT CGGCCATGAT ATAGACGTTG TGGCTGTTGT AGTTGTACTC
1021   CAGCTTGTGC CCCAGGATGT TGCCGTCCTC CTTGAAGTCG ATGCCCTTCA GCTCGATGCG
1081   GTTACCAGG GTGTCGCCCT CGAACTTCAC CTCGGCGCGG GTCTTGTAGT TGCCGTCGTC
1141   CTTGAAGAAG ATGGTGCCTT CCTGGACGTA GCCTTCGGGC ATGGCGGACT TGAAGAAGTC
1201   GTGCTGCTTC ATGTGGTCGG GGTAGCGGCT GAAGCACTGC ACGCCGTAGG TCAGGGTGGT
1261   CACGAGGGTG GGCCAGGGCA CGGGCAGCTT GCCGTTGGTG CAGATGAACT TCAGGGTCAG
  
```

|      |            |             |             |            |            |             |
|------|------------|-------------|-------------|------------|------------|-------------|
| 1321 | CTTGCCGTAG | GTGGCATCGC  | CCTCGCCCTC  | GCCGGACACG | CTGAACTTGT | GGCCGTTTAC  |
| 1381 | GTCGCCGTCC | AGCTCGACCA  | GGATGGGCAC  | CACCCCAGTG | AACAGCTCCT | CGCCCTTGCT  |
| 1441 | CACCATGGTG | GCGACCGGTA  | GCGCTAGCGG  | ATCTGACGGT | TCACTAAACC | AGCTCTGCTT  |
| 1501 | ATATAGACCT | CCCACCGTAC  | ACGCTACCG   | CCCATTGACG | TCAATGGGAG | TTTGTTTTGG  |
| 1561 | CACCAAAATC | AACGGGACTT  | TCCAAAATGT  | CGTAACTACT | CCGCCCCATT | GACGCAAATG  |
| 1621 | GGCGGTAGGC | GTGTACGGTG  | GGAGGTCTAT  | ATAAGCAGAG | CTCTCTGGCT | AACTAGAGAA  |
| 1681 | CCCCTGCTT  | ACTGGCTTAT  | CGAAATTAAT  | ACGACTCACT | ATAGGGAGAC | CCAAGCTGGC  |
| 1741 | TAGTTAAGCT | TGGTACCGAG  | CTCGGATCCA  | CCATGGACAA | AGACTGCGAA | ATGAAGCGCA  |
| 1801 | CCACCCTGGA | TAGCCCTCTG  | GGCAAGCTGG  | AACTGTCTGG | GTGCGAACAG | GGCCTGCACC  |
| 1861 | GTATCATCTT | CCTGGGCAAA  | GGAAACATCTG | CCGCCGACGC | CGTGGAAAGT | CCTGCCCCAG  |
| 1921 | CCGCCGTGCT | GGCCTGGACCA | GAGCCACTGA  | TGCAGGCCAC | CGCTGGGCTC | AACGCCCTACT |
| 1981 | TTCACCAGCC | TGAGGCCATC  | GAGGAGTTCC  | CTGTGCCAGC | CCTGCACCAC | CCAGTGTTC   |
| 2041 | AGCAGGAGAG | CTTTACCCGC  | CAGGTGCTGT  | GGAAACTGCT | GAAAGTGGTG | AAGTTCGGAG  |
| 2101 | AGGTCATCAG | CTACAGCCAC  | CTGGCCGCC   | TGGCCGGCAA | TCCCGCCGCC | ACCGCCGCCG  |
| 2161 | TGAAAACCGC | CCTGAGCGGA  | AATCCCGTGC  | CCATTCTGAT | CCCCTGCCAC | CGGGTGGTGC  |
| 2221 | AGGGCGACCT | GGACGTGGGG  | GGCTACGAGG  | GCGGGCTCGC | CGTAAAAGAG | TGGCTGCTGG  |
| 2281 | CCCACGAGGG | CCACAGACTG  | GGCAAGCCTG  | GGCTGGGTCC | TGCAGGCCGA | GGCGCGCCAG  |
| 2341 | GGTCTGGCGG | CGGCAGTAAG  | GCAGAACGCA  | TGGGTTCAC  | AGAGGTAACC | CCAGTGACAG  |
| 2401 | GGGCCAGTCT | CAGAAGAACT  | ATGCTCCTCC  | TCTCAAGTC  | CCCAGAAGCA | CAGCCAAAGA  |
| 2461 | CACTCCCTCT | CACTGGCAGC  | ACCTTCCATG  | ACCAGATAGC | CATGCTGAGC | CACCGGTGCT  |
| 2521 | TCAACACTCT | GACTAACAGC  | TTCCAGCCCT  | CCTTGCCTCG | CCGCAAGATT | CTGGCCGCCA  |
| 2581 | TCATTATGAA | AAAAGACTCT  | GAGGACATGG  | GTGTCGTCGT | CAGCTTGGGA | ACAGGGAATC  |
| 2641 | GCTGTGTAAA | AGGAGATTCT  | CTCAGCCTAA  | AAGGAGAAAC | TGTCAATGAC | TGCCATGCAG  |
| 2701 | AAATAATCTC | CCGGAGAGGC  | TTCATCAGGT  | TTCTCTACAG | TGAGTTAATG | AAATACAAC   |
| 2761 | CCCAGACTGC | GAAGGATAGT  | ATATTTGAAC  | CTGCTAAGGG | AGGAGAAAAG | CTCCAAATAA  |
| 2821 | AAAAGACTGT | GTCATTCCAT  | CTGTATATCA  | GCACTGCTCC | GTGTGGAGAT | GGCGCCCTCT  |
| 2881 | TTGACAAGTC | CTGCAGCGAC  | CGTGCTATGG  | AAAGCACAGA | ATCCCGCCAC | TACCCTGTCT  |
| 2941 | TCGAGAATCC | CAAACAAGGA  | AAGCTCCGCA  | CCAAGTGGGA | GAACGGACA  | GACACAATCC  |
| 3001 | CTGTGGAATC | CAGTGACATT  | GTGCCCTACGT | GGGATGGCAT | TCGGCTCGGG | GAGAGACTCC  |
| 3061 | GTACCATGTC | CTGTAGTGAC  | AAAATCCTAC  | GCTGGAACGT | GCTGGGCCTG | CAAGGGGCAC  |
| 3121 | TGTTGACCCA | CTTCTGACAG  | CCCATTTATC  | TCAAATCTGT | CACATTGGGT | TACCTTTTCA  |
| 3181 | GCCAAGGGCA | TCTGACCCGT  | GCTATTTGCT  | GTCGTGTGAC | AAGAGATGGG | AGTGCATTTG  |
| 3241 | AGGATGGACT | ACGACATCCC  | TTTATTTGCA  | ACCACCCCAA | GGTTGGCAGA | GTCAGCATAT  |
| 3301 | ATGATTCCAA | AAGGCAATCC  | GGGAAGACTA  | AGGAGACAAG | CGTCAACTGG | TGCTGGCTG   |
| 3361 | ATGGCTATGA | CCTGGAGATC  | CTGGACGGTA  | CCAGAGGCAC | TGTGGATGGG | CCACGGAATG  |
| 3421 | AATTGTCCCG | GGTCTCCAAA  | AAGAACATTT  | TTCTTCTATT | TAAGAAGCTC | TGCTCCTTCC  |
| 3481 | GTTACCGCAG | GGATCTACTG  | AGACTCTCCT  | ATGGTGAGGC | CAAGAAAGCT | GCCCCTGACT  |
| 3541 | ACGAGACGGC | CAAGAACTAC  | TTCAAAAAAG  | GCTGAAGGA  | TATGGGCTAT | GGAACTGGA   |
| 3601 | TTAGCAAACC | CCAGGAGGAA  | AAGAACTTTT  | ATCTCTGCC  | AGTATCTAGA | GGGCCCTTCG  |
| 3661 | AACAAAAACT | CATCTCAGAA  | GAGGATCTGA  | ATATGCATAC | CGGTCATCAT | CACCATCACC  |
| 3721 | ATTGAGTTGA | AACCCGCTGA  | TCAGCCTCGA  | CTGTGCCCTC | TAGTTGCCAG | CCATCTGTTG  |
| 3781 | TTTGCCCCTC | CCCCGTGCCT  | TCCTTGACCC  | TGGAAGGTGC | CACTCCCCTC | GTCCTTTTCT  |
| 3841 | AATAAAATGA | GGAAATTGCA  | TCGCATTGTC  | TGAGTAGGTG | TCATTCTATT | CTGGGGGGTG  |
| 3901 | GGGTGGGGCA | GGACAGCAAG  | GGGGAGGATT  | GGGAAGACAA | TAGCAGGCAT | GCTGGGGATG  |
| 3961 | CGGTGGGCTC | TATGGCTTAG  | AGAAGCTTTC  | TAGAGGATCT | GGGCGTGGTT | AAGGGTGGGA  |
| 4021 | AAGAATATAT | AAGGTGGGGG  | TCTTATGTAG  | TTTTGTATCT | GTTTTGCAGC | AGCCGCCGCC  |
| 4081 | GCCATGAGCA | CCAACTCGTT  | TGATGGAAGC  | ATTGTGAGCT | CATATTTGAC | AACGCGCATG  |
| 4141 | CCCCCATGGG | CCGGGGTGCG  | TCAGAATGTG  | ATGGGCTCCA | GCATTGATGG | TCGCCCCGTC  |
| 4201 | CTGCCCGCAA | ACTCTACTAC  | CTTGACCTAC  | GAGACCGTGT | CTGGAACGCC | GTTGGAGACT  |
| 4261 | GCAGCCTCCG | CCGCCGCTTC  | AGCCGCTGCA  | GCCACCGCCC | GCGGGATTGT | GACTGACTTT  |
| 4321 | GCTTTCTTGA | GCCCCTTTCG  | AAGCAGTGCA  | GCTTCCCGTT | CATCCGCCCG | CGATGACAAG  |
| 4381 | TTGACGGCTC | TTTTGGCACA  | ATTGGATTCT  | TTGACCCGGG | AACTTAATGT | CGTTTCTCAG  |
| 4441 | CAGCTGTTGG | ATCTGCGCCA  | GCAGGTTTCT  | GCCCTGAAGG | CTTCTTCCC  | TCCCAATGCG  |
| 4501 | GTTTAAAACA | TAAATAAAAA  | ACCAGACTCT  | GTTTGGATTT | GGATCAAGCA | AGTGTCTTGC  |
| 4561 | TGTCTTTTAT | TAGGGGTTTT  | GCGCGCGCGG  | TAGGCCCGGG | ACCAGCGGTC | TCGGTCGTTG  |
| 4621 | AGGGTCTGT  | GTATTTTTTC  | CAGGACGTGG  | TAAAGGTGAC | TCTGGATGTT | CAGATACATG  |
| 4681 | GGCATAAGCC | CGTCTCTGGG  | GTGGAGGTAG  | CACCACTGCA | GAGCTTCATG | CTGCGGGGTG  |
| 4741 | GTGTTGTAGA | TGATCCAGTC  | GTAGCAGGAG  | CGCTGGGCGT | GGTGCCTAAA | AATGTCTTTC  |
| 4801 | AGTAGCAAGC | TGATTGCCAG  | GGGCAGGCC   | TTGGTGTAAG | TGTTTACAAA | GCGGTTAAGC  |
| 4861 | TGGGATGGGT | GCATACGTGG  | GGATATGAGA  | TGCATCTTGG | ACTGTATTTT | TAGGTTGGCT  |
| 4921 | ATGTTCCAG  | CCATATCCCT  | CCGGGGATT   | ATGTTGTGCA | GAACCACCAG | CACAGTGTAT  |

|      |             |                |             |            |             |             |
|------|-------------|----------------|-------------|------------|-------------|-------------|
| 4981 | CCGGTGC     | ACT TGGGAAATTT | GTCATGTAGC  | TTAGAAGGAA | ATGCGTGGAA  | GAACCTGGAG  |
| 5041 | ACGCCCTTGT  | GACCTCCAAG     | ATTTTCCATG  | CATTCGTCCA | TAATGATGGC  | AATGGGCCCA  |
| 5101 | CGGGCGGCGG  | CCTGGGCGAA     | GATATTTCTG  | GGATCACTAA | CGTCATAGTT  | GTGTTCCAGG  |
| 5161 | ATGAGATCGT  | CATAGGCCAT     | TTTTACAAAG  | CGCGGGCGGA | GGGTGCCAGA  | CTGCGGTATA  |
| 5221 | ATGGTTCCAT  | CCGGCCAGG      | GGCGTAGTTA  | CCCTCACAGA | TTTGCATTTT  | CCACGCTTTG  |
| 5281 | AGTTCAGATG  | GGGGGATCAT     | GTCTACCTGC  | GGGGCGATGA | AGAAAACGGT  | TTCCGGGGTA  |
| 5341 | GGGGAGATCA  | GCTGGGAAGA     | AAGCAGGTTT  | CTGAGCAGCT | GCGACTTACC  | GCAGCCGGTG  |
| 5401 | GGCCCCTAAA  | TCACACCTAT     | TACCGGCTGC  | AACTGGTAGT | TAAGAGAGCT  | GCAGCTGCCG  |
| 5461 | TCATCCCTGA  | GCAGGGGGG      | CACTTCGTTA  | AGCATGTCCC | TGACTCGCAT  | GTTTTCCCTG  |
| 5521 | ACCAAATCCG  | CCAGAAGGCG     | CTCCCGCCC   | AGCGATAGCA | GTTCTTGCAA  | GGAAGCAAAG  |
| 5581 | TTTTTCAACG  | GTTTGAGACC     | GTCGCGCGTA  | GGCATGCTTT | TGAGCGTTTG  | ACCAAGCAGT  |
| 5641 | TCCAGGCGGT  | CCCACAGCTC     | GGTCACCTGC  | TCTACGGCAT | CTCGATCCAG  | CATATCTCCT  |
| 5701 | CGTTTTCGCGG | GTTGGGGCGG     | CTTTCGCTGT  | ACGGCAGTAG | TCGGTGCTCG  | TCCAGACGGG  |
| 5761 | CCAGGGTCAT  | GTCTTTCCAC     | GGGCGCAGGG  | TCCTCGTCAG | CGTAGTCTGG  | GTCACGGTGA  |
| 5821 | AGGGGTGCGC  | TCCGGGCTGC     | GCGCTGGCCA  | GGGTGCGCTT | GAGGCTGGTC  | CTGCTGGTGC  |
| 5881 | TGAAGCGCTG  | CCGGTCTTCG     | CCCTGCGCGT  | CGGCCAGGTA | GCATTTGACC  | ATGGTGTCTAT |
| 5941 | AGTCCAGCCC  | CTCCGCGGCG     | TGGCCCTTGG  | CGCGCAGCTT | GCCCTTGGAG  | GAGGCGCCGC  |
| 6001 | ACGAGGGGCA  | GTGCAGACTT     | TTGAGGGCGT  | AGAGCTTGGG | CGCGAGAAAT  | ACCGATTCCG  |
| 6061 | GGGAGTAGGC  | ATCCGCGCCG     | CAGGCCCCGC  | AGACGGTCTC | GCATTCCACG  | AGCCAGGTGA  |
| 6121 | GCTCTGGCCG  | TTCGGGGTCA     | AAAACCAGGT  | TTCCCCCATG | CTTTTTGATG  | CGTTTTCTTAC |
| 6181 | CTCTGGTTTC  | CATGAGCCGG     | TGTCCACGCT  | CGGTGACGAA | AAGGCTGTCC  | GTGTCCCCGT  |
| 6241 | ATACAGACTT  | GAGAGGGAGT     | TTAAACGAAT  | TCAATAGCTT | GTTGCATGGG  | CGGCGATATA  |
| 6301 | AAATGCAAGG  | TGCTGTCTAA     | AAAATCAGGC  | AAAGCCTCGC | GCAAAAAAGA  | AAGCACATCG  |
| 6361 | TAGTCATGCT  | CATGCAGATA     | AAGGCAGGTA  | AGTCCGGAA  | CCACCACAGA  | AAAAGACACC  |
| 6421 | ATTTTTCTCT  | CAAACATGTC     | TGCGGGTTTC  | TGCATAAACA | CAAAAATAAAA | TAACAAAAAA  |
| 6481 | ACATTTAAAC  | ATTAGAAGCC     | TGTCTTACAA  | CAGGAAAAAC | AACCTTATA   | AGCATAAGAC  |
| 6541 | GGACTACGGC  | CATGCCGGCG     | TGACCGTAAA  | AAAACCTGGT | ACCGTGATTA  | AAAAGCAGCA  |
| 6601 | CCGACAGCTC  | CTCGGTCAAT     | TCCGGAGTCA  | TAATGTAAGA | CTCGGTAAAC  | ACATCAGGTT  |
| 6661 | GATTCACATC  | GGTCAGTGCT     | AAAAAGCGAC  | GAAATAGCC  | CGGGGAATA   | CATACCCGCA  |
| 6721 | GGCGTAGAGA  | CAACATTACA     | GCCCCATAG   | GAGGTATAAC | AAAATTAATA  | GGAGAGAAAA  |
| 6781 | ACACATAAAC  | ACCTGAAAAA     | CCCTCCTGCC  | TAGGCAAAAT | AGCACCCCTC  | CGCTCCAGAA  |
| 6841 | CAACATACAG  | CGCTTCCACA     | GCGGCAGCCA  | TAACAGTCAG | CCTTACCAGT  | AAAAAAGAAA  |
| 6901 | ACCTATTAAA  | AAAACACCAC     | TCGACACGGC  | ACCAGCTCAA | TCAGTCACAG  | TGTAAAAAAG  |
| 6961 | GGCCAAGTGC  | AGAGCGAGTA     | TATATAGGAC  | TAAAAAATGA | CGTAACGGTT  | AAAGTCCACA  |
| 7021 | AAAAACACCC  | AGAAAACCGC     | ACGCGAACCT  | ACGCCCAGAA | ACGAAAGCCA  | AAAAACCCAC  |
| 7081 | AACTTCTCTA  | AATCGTCACT     | TCCGTTTTTC  | CACGTTACGT | CACTTCCCAT  | TTTAAGAAAA  |
| 7141 | CTACAATTCC  | CAACACATAC     | AAGTTACTCC  | GCCCTAAAAC | CTACGTCACC  | CGCCCCGTTT  |
| 7201 | CCACGCCCCG  | CGCCACGTCA     | CAAACCTCC   | CCCTCATTA  | TCATATTGGC  | TTCAATCCAA  |
| 7261 | AATAAGGTAT  | ATTATTGATG     | ATGTTAATTA  | ACATGCATGG | ATCCATATGC  | GGTGTGAAAT  |
| 7321 | ACCGCACAGA  | TGCGTAAGGA     | GAAAAATACCG | CATCAGGCGC | TCTTCCGCTT  | CCTCGCTCAC  |
| 7381 | TGACTCGCTG  | CGCTCGGTCG     | TTCGGCTGCG  | GCGAGCGGTA | TCAGTCACT   | CAAAGGCGGT  |
| 7441 | AATACGGTTA  | TCCACAGAAT     | CAGGGGATAA  | CGCAGGAAAG | AACATGTGAG  | CAAAGGCCA   |
| 7501 | GCAAAAGGCC  | AGGAACCGTA     | AAAAGGCCGC  | GTGCTGGCG  | TTTTTCCATA  | GGCTCCGCC   |
| 7561 | CCCTGACGAG  | CATCACAAAA     | ATCGACGCTC  | AAGTCAGAGG | TGGCGAAACC  | CGACAGGACT  |
| 7621 | ATAAAGATAC  | CAGGCGTTTC     | CCCCTGGAAG  | CTCCCTCGTG | CGCTCTCCTG  | TTCCGACCTT  |
| 7681 | GCCGCTTACC  | GGATACCTGT     | CCGCTTTCT   | CCCTTCGGGA | AGCGTGGCGC  | TTTCTCATAG  |
| 7741 | CTCACGCTGT  | AGGTATCTCA     | GTTTCGGTGTA | GGTCGTTGCG | TCCAAGCTGG  | GCTGTGTGCA  |
| 7801 | CGAACCCCCC  | GTTTACGCCC     | ACCGCTGCGC  | CTTATCCGGT | AACTATCGTC  | TTGAGTCCAA  |
| 7861 | CCCGGTAAGA  | CACGACTTAT     | CGCCACTGGC  | AGCAGCCACT | GGTAACAGGA  | TTAGCAGAGC  |
| 7921 | GAGGTATGTA  | GGCGGTGCTA     | CAGAGTTCTT  | GAAGTGGTGG | CCTAACCTACG | GCTACACTAG  |
| 7981 | AAGGACAGTA  | TTTGGTATCT     | GCGCTCTGCT  | GAAGCCAGTT | ACCTTCGGAA  | AAAGAGTTGG  |
| 8041 | TAGCTCTTGA  | TCCGGCAAAC     | AAACCACCGC  | TGGTAGCGGT | GGTTTTTTTT  | TTTGCAAGCA  |
| 8101 | GCAGATTACG  | CGCAGAAAAA     | AAGGATCTCA  | AGAAGATCCT | TTGATCTTTT  | CTACGGGGTC  |
| 8161 | TGACGCTCAG  | TGGAACGAAA     | ACTCACGTTA  | AGGGATTTTG | GTCATGAGAT  | TATCAAAAAG  |
| 8221 | GATCTTCACC  | TAGATCCTTT     | TAAATTAATA  | ATGAAGTTT  | AAATCAATCT  | AAAGTATATA  |
| 8281 | TGAGTAAACT  | TGGTCTGACA     | GTTACCAATG  | CTTAATCAGT | GAGGCACCTA  | TCTCAGCGAT  |
| 8341 | CTGTCTATTT  | CGTTCATCCA     | TAGTTGCCTG  | ACTCCCCGTC | GTGTAGATAA  | CTACGATACG  |
| 8401 | GGAGGGCTTA  | CCATCTGGCC     | CCAGTGCTGC  | AATGATACCG | CGAGACCCAC  | GCTCACGGGC  |
| 8461 | TCCAGATTTA  | TCAGCAATAA     | ACCAGCCAGC  | CGGAAGGGCC | GAGCGCAGAA  | GTGGTCTTGC  |
| 8521 | AACTTTATCC  | GCCTCCATCC     | AGTCTATTA   | TTGTTGCCGG | GAAGCTAGAG  | TAAGTAGTTC  |
| 8581 | GCCAGTTAAT  | AGTTTGCGCA     | ACGTTGTTGC  | CATTGCTGCA | GCCATGAGAT  | TATCAAAAAG  |

8641 GATCTTCACC TAGATCCTTT TCACGTAGAA AGCCAGTCCG CAGAAACGGT GCTGACCCCG  
8701 GATGAATGTC AGCTACTGGG CTATCTGGAC AAGGGAAAAC GCAAGCGCAA AGAGAAAGCA  
8761 GGTAGCTTGC AGTGGGCTTA CATGGCGATA GCTAGACTGG GCGGTTTTAT GGACAGCAAG  
8821 CGAACCGGAA TTGCCAGCTG GGGCGCCCTC TGGTAAGGTT GGGAAAGCCCT GCAAAGTAAA  
8881 CTGGATGGCT TTCTTGCCGC CAAGGATCTG ATGGCGCAGG GGATCAAGCT CTGATCAAGA  
8941 GACAGGATGA GGATCGTTTC GCATGATTGA ACAAGATGGA TTGCACGCAG GTTCTCCGGC  
9001 CGCTTGGGTG GAGAGGCTAT TCGGCTATGA CTGGGCACAA CAGACAATCG GCTGCTCTGA  
9061 TGCCGCCGTG TTCCGGCTGT CAGCGCAGGG GCGCCCGGTT CTTTTGTCA AGACCGACCT  
9121 GTCCGGTGCC CTGAATGAAC TGCAAGACGA GGCAGCGCGG CTATCGTGGC TGGCCACGAC  
9181 GGGCGTTCCT TGCGCAGCTG TGCTCGACGT TGTCACTGAA CCGGGAAGGG ACTGGCTGCT  
9241 ATTGGGCGAA GTGCCGGGGC AGGATCTCCT GTCATCTCAC CTTGCTCCTG CCGAGAAAGT  
9301 ATCCATCATG GCTGATGCAA TGCGGCGGCT GCATACGCTT GATCCGGCTA CCTGCCATT  
9361 CGACCACCAA GCGAAACATC GCATCGAGCG AGCACGTA CTGATGGAAG CCGGTCTTGT  
9421 CGATCAGGAT GATCTGGACG AAGAGCATCA GGGGCTCGCG CCAGCCGAAC TGTTCCGCCAG  
9481 GCTCAAGGCG AGCATGCCCG ACGGCGAGGA TCTCGTCGTG ACCCATGGCG ATGCCCTGCTT  
9541 GCCGAATATC ATGGTGGAAA ATGGCCGCTT TTCTGGATTC ATCGACTGTG GCCGGCTGGG  
9601 TGTGGCGGAC CGCTATCAGG ACATAGCGTT GGCTACCCGT GATATTGCTG AAGAGCTTGG  
9661 CGGCGAATGG GCTGACCGCT TCCTCGTGCT TTACGGTATC GCCGCTCCCG ATTCGCAGCG  
9721 CATCGCCTTC TATCGCCTTC TTGACGAGTT CTCTGAATT TTGTTAAAAT TTTTGTAA  
9781 TCAGCTCATT TTTTAACCAA TAGGCCGAAA TCGGCAAAAT CCCTTATAAA TCAAAAGAAT  
9841 AGACCGAGAT AGGGTTGAGT GTTGTTCAG TTTGGAACAA GAGTCCACTA TTAAAGAACG  
9901 TGGACTCCAA CGTCAAAGGG CGAAAAACCG TCTATCAGGG CGATGGCCCA CTACGTGAAC  
9961 CATCACCTA ATCAAGTTTT TTGGGGTCGA GGTGCCGTAA AGCACTAAAT CGGAACCCTA  
10021 AAGGGAGCCC CCGATTTAGA GCTTGACGGG GAAAGCCGGC GAACGTGGCG AGAAAGGAAG  
10081 GGAAGAAAGC GAAAGGAGCG GGCCTAGGG CGCTGGCAAG TGTAGCGGTC ACGCTGCGCG  
10141 TAACCACCAC ACCCGCCGCG CTTAATGCGC CGCTACAGGG CGCGTCCATT CGCCATTAG  
10201 GATCGAATTA ATTCTTAATT AACATCATCA ATAATA



**Plasmid-map and sequence of EF1A\_GFP\_SA1Q\_pLentiPuro (pTS1025).** E>Q site is highlighted in cyan:

Created with SnapGene®

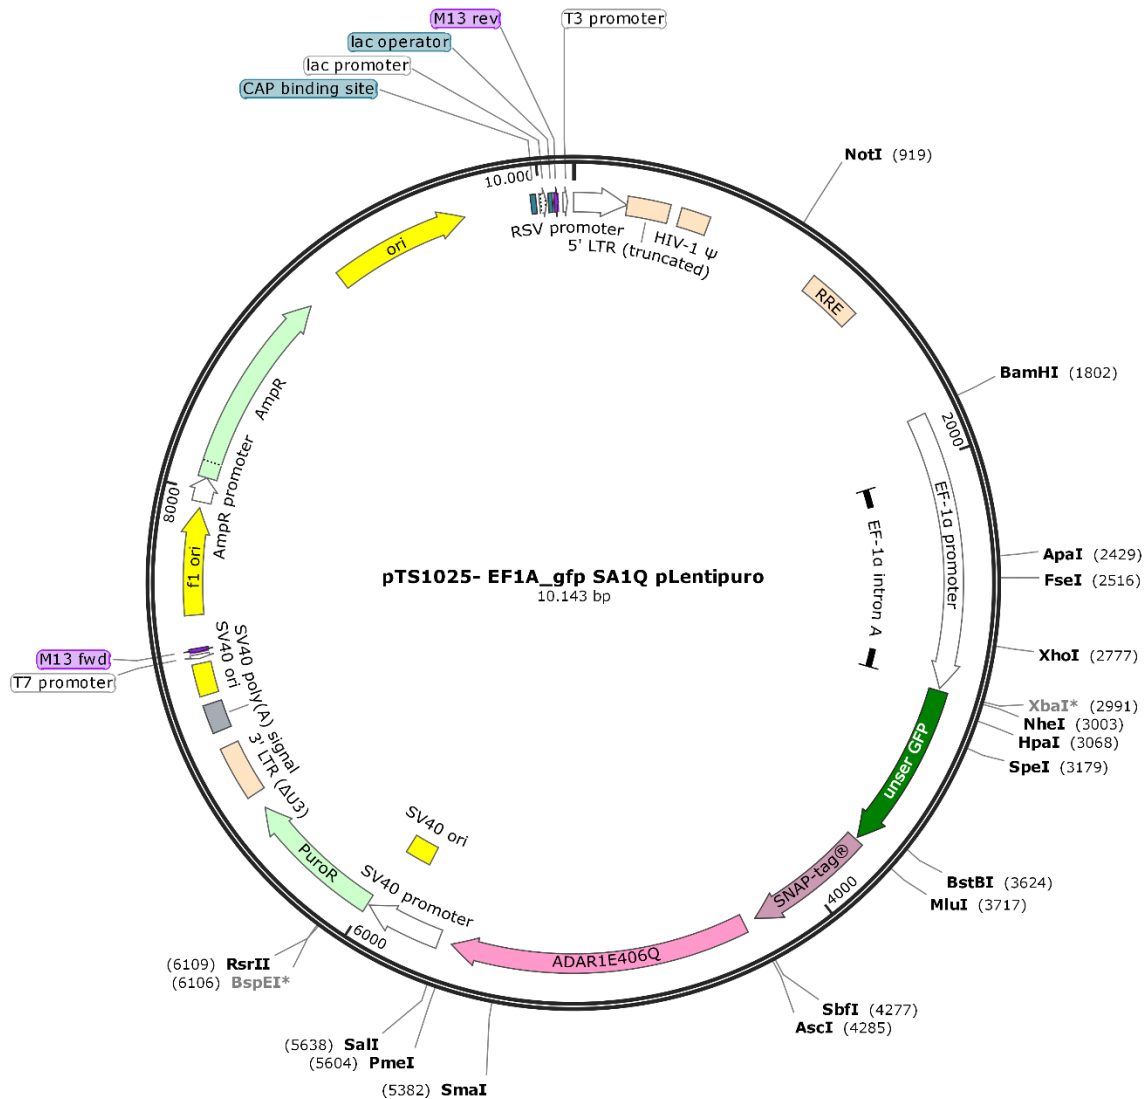

```

1      ATGTAGTCTT ATGCAATACT CTTGTAGTCT TGCAACATGG TAACGATGAG TTAGCAACAT
61     GCCTTACAAG GAGAGAAAAA GCACCGTGCA TGCCGATTGG TGGAAGTAAG GTGGTACGAT
121    CGTGCCTTAT TAGGAAGGCA ACAGACGGGT CTGACATGGA TTGGACGAAC CACTGAATTG
181    CCGCATTGCA GAGATATTGT ATTTAAGTGC CTAGCTCGAT ACATAAACGG GTCTCTCTGG
241    TTAGACCAGA TCTGAGCCTG GGAGCTCTCT GCCTAACTAG GGAACCCACT GCTTAAGCCT
301    CAATAAAGCT TGCCTTGAGT GCTTCAAGTA GTGTGTGCC GTCTGTTGTG TGACTCTGGT
361    AACTAGAGAT CCCTCAGACC CTTTTAGTCA GTGTGGAAAA TCTCTAGCAG TGGCGCCCGA
421    ACAGGGACTT GAAAGCGAAA GGGAAAACCAG AGGAGCTCTC TCGACGCAGG ACTCGGCTTG
481    CTGAAGCGCG CACGGCAAGA GGCGAGGGGC GGCGACTGGT GAGTACGCCA AAAAATTTTGA
541    CTAGCGGAGG CTAGAAGGAG AGAGATGGGT GCGAGAGCGT CAGTATTAAG CGGGGGAGAA
601    TTAGATCGCG ATGGGAAAAA ATTCGGTTAA GGCCAGGGGG AAAGAAAAAA TATAAATTA
661    AACATATAGT ATGGGCAAGC AGGGAGCTAG AACGATTCGC AGTTAATCCT GGCCGTGTTAG
721    AAACATCAGA AGGCTGTAGA CAAATACTGG GACAGCTACA ACCATCCCTT CAGACAGGAT
781    CAGAAGAACT TAGATCATT AATAATACAG TAGCAACCCT CTATTGTGTG CATCAAAGGA
841    TAGAGATAAA AGACACCAAG GAAGCTTTAG ACAAGATAGA GGAAGAGCAA AACAAAAGTA
901    AGACCACCGC ACAGCAAGCG GCCGCTGATC TTCAGACCTG GAGGAGGAGA TATGAGGGAC
961    AATTGGAGAA GTGAATTATA TAAATATAAA GTAGTAAAAA TTGAACCATT AGGAGTAGCA
  
```

|      |             |            |             |             |            |             |
|------|-------------|------------|-------------|-------------|------------|-------------|
| 1021 | CCCACCAAGG  | CAAAGAGAAG | AGTGGTGCAG  | AGAGAAAAAA  | GAGCAGTGGG | AATAGGAGCT  |
| 1081 | TTGTTCCCTG  | GGTTCCTGGG | AGCAGCAGGA  | AGCACTATGG  | GCGCAGCGTC | AATGACGCTG  |
| 1141 | ACGGTACAGG  | CCAGACAATT | ATTGTCTGGT  | ATAGTGCAGC  | AGCAGAACAA | TTTGCCTGAGG |
| 1201 | GCTATTGAGG  | CGCAACAGCA | TCTGTTGCAA  | CTCACAGTCT  | GGGGCATCAA | GCAGCTCCAG  |
| 1261 | GCAAGAATCC  | TGGCTGTGGA | AAGATACCTA  | AAGGATCAAC  | AGTCCTGGG  | GATTTGGGGT  |
| 1321 | TGCTCTGGAA  | AACTCATTTG | CACCACTGCT  | GTGCCTTGG   | ATGCTAGTTG | GAGTAATAAA  |
| 1381 | TCTCTGGAAC  | AGATTTGGAA | TCACACGACC  | TGGATGGAGT  | GGGACAGAGA | AATTAACAAT  |
| 1441 | TACACAAGCT  | TAATACACTC | CTTAATTGAA  | GAATCGCAAA  | ACCAGCAAGA | AAAGAATGAA  |
| 1501 | CAAGAATTAT  | TGGAATTAGA | TAAATGGGCA  | AGTTTGTGGA  | ATTGGTTTAA | CATAACAAAT  |
| 1561 | TGGCTGTGGT  | ATATAAAAAT | ATTCATAATG  | ATAGTAGGAG  | GCTTGGTAGG | TTTAAGAATA  |
| 1621 | GTTTTTGTCTG | TACTTTCTAT | AGTGAATAGA  | GTTAGGCAGG  | GATATTCACC | ATTATCGTTT  |
| 1681 | CAGACCCACC  | TCCCAACCCC | GAGGGGACCC  | GACAGGCCCG  | AAGGAATAGA | AGAAGAAGGT  |
| 1741 | GGAGAGAGAG  | ACAGAGACAG | ATCCATTGCA  | TTAGTGAACG  | GATCTCGACG | GTATCGCTAG  |
| 1801 | TGGATCCGTG  | AGGCTCCGGT | GCCCGTCAGT  | GGGCAGAGCG  | CACATCGCCC | ACAGTCCCCG  |
| 1861 | AGAAGTTGGG  | GGGAGGGGTC | GGCAATTGAA  | CCGGTGCCTA  | GAGAAGGTGG | CGCGGGGTAA  |
| 1921 | ACTGGGAAAG  | TGATGTCGTG | TACTGGCTCC  | GCCTTTTTTCC | CGAGGGTGGG | GGAGAACCGT  |
| 1981 | ATATAAGTGC  | AGTAGTCGCC | GTGAACGTTT  | TTTTTTCGCA  | CGGGTTTGCC | GCCAGAACAC  |
| 2041 | AGGTAAGTGC  | CGTGTGTGGT | TCCCGCGGGC  | CTGGCCTCTT  | TACGGGTTAT | GGCCCTTGCG  |
| 2101 | TGCCTTGAAT  | TACTTCCACC | TGGCTGCAGT  | ACGTGATTCT  | TGATCCCGAG | CTTCGGGTTG  |
| 2161 | GAAGTGGGTG  | GGAGAGTTCG | AGGCCCTGCG  | CTTAAGGAGC  | CCCTTCGCCT | CGTGCCTGAG  |
| 2221 | TTGAGGCCTG  | GCCTGGGCGC | TGGGGCCGCC  | GCGTGCGAAT  | CTGGTGGCAC | CTTCGCGCCT  |
| 2281 | GTCTCGCTGC  | TTTCGATAAG | TCTCTAGCCA  | TTTAAAAATTT | TTGATGACCT | GCTGCGACGC  |
| 2341 | TTTTTTTTCTG | GCAAGATAGT | CTTGTAATATG | CGGGCCAAGA  | TCTGCACACT | GGTATTTTCGG |
| 2401 | TTTTTTGGGGC | CGCGGGCGGC | GACGGGGCCC  | GTGCGTCCCA  | GCGCACATGT | TCGGCGAGGC  |
| 2461 | GGGGCCTGCG  | AGCGCGGCCA | CCGAGAATCG  | GACGGGGGTA  | GTCTCAAGCT | GGCCGGCCTG  |
| 2521 | CTCTGGTGGC  | TGGCCTCGCG | CCGCCGTGTA  | TCGCCCCGCC  | CTGGGCGGCA | AGGCTGGCCC  |
| 2581 | GGTCCGCACC  | AGTTGCGTGA | GCGGAAAGAT  | GGCCGCTTCC  | CGGCCCTGCT | GCAGGGAGCT  |
| 2641 | CAAAATGGAG  | GACGCGGCGC | TCGGGAGAGC  | GGCGGGGTGA  | GTCACCCACA | CAAAGGAAAA  |
| 2701 | GGGCCTTTCC  | GTCCTCAGCC | GTCGCTTCAT  | GTGACTCCAC  | GGAGTACCGG | GCGCCGTCCA  |
| 2761 | GGCACCTCGA  | TTAGTTCTCG | AGCTTTTTGGA | GTACGTCTGC  | TTTAGGTTGG | GGGGAGGGGT  |
| 2821 | TTTATGCGAT  | GGAGTTTCCC | CACACTGAGT  | GGGTGGAGAC  | TGAAGTTAGG | CCAGCTTGCC  |
| 2881 | ACTTGATGTA  | ATTCTCCTTG | GAATTTGCC   | TTTTTGAGTT  | TGGATCTTGG | TTCATTTCTCA |
| 2941 | AGCCTCAGAC  | AGTGGTTCAA | AGTTTTTTTT  | TTCCATTTCA  | GGTGTCTGTA | TCTAGAACCA  |
| 3001 | TGGCTAGCAA  | AGGAGAAGAA | CTCTTCACTG  | GAGTTGTCCC  | AATTTCTGTT | GAATTAGATG  |
| 3061 | GTGATGTTAA  | CGGCCACAAG | TTCTCTGTCA  | GTGGAGAGGG  | TGAAGGTGAT | GCAACATACG  |
| 3121 | GAAAACCTTAC | CCTGAAGTTC | ATCTGCACTA  | CTGGCAAAC   | GCCTGTTCCG | TGGCCGACAC  |
| 3181 | TAGTGACGAC  | GCTCTGCTAT | GCGTCCAGT   | GCTTTTCAAG  | ATACCCGGAT | CACATGAAAC  |
| 3241 | GGCATGACTT  | TTTCAAGAGT | GCCATGCCCC  | AAGGTTATGT  | ACAGGAAAGG | ACCATCTTCT  |
| 3301 | TCAAAGATGA  | CGGCAACTAC | AAGACACGTG  | CTGAAGTCAA  | GTTTGAAGGT | GATACCCTTG  |
| 3361 | TTAATAGAAT  | CGAGTTAAAA | GGTATTGACT  | TCAAGGAAGA  | TGGCAACATT | CTGGGACACA  |
| 3421 | AATTGGAATA  | CAACTATAAC | TCACACAATG  | TATACATCAT  | GGCAGACAAA | CAAAAGAATG  |
| 3481 | GAATCAAAGT  | GAACCTCAAG | ACCCGCCACA  | ACATTGAAGA  | TGGAAGCGTT | CAACTAGCAG  |
| 3541 | ACCATTATCA  | ACAAAATACT | CCAATTGGCG  | ATGGCCCTGT  | CCTTTTACCA | GACAACCATT  |
| 3601 | ACCTGTCCAC  | ACAATCTGCC | CTTTCGAAA   | ATCCCAACGA  | AAAGAGAGAC | CACATGGTCC  |
| 3661 | TTCTTGAGTT  | TGTAACAGCT | GCTGGGATTA  | CACATGGCAT  | GGATGAACTA | TACAAAACGC  |
| 3721 | TTACCATGGA  | CAAAGACTGC | GAAATGAAGC  | GACCCACCC   | GGATAGCCCT | CTGGGCAAGC  |
| 3781 | TGGAAGTGTG  | TGGGTGCGAA | CAGGGCCTGC  | ACCGTATCAT  | CTTCCCTGGG | AAAGGAACAT  |
| 3841 | CTGCCGCCGA  | CGCCGTGGAA | GTGCCTGCCC  | CAGCCGCCGT  | GCTGGGCGGA | CCAGAGCCAC  |
| 3901 | TGATGCAGGC  | CACCGCCTGG | CTCAACGCCT  | ACTTTCACCA  | GCCTGAGGCC | ATCGAGGAGT  |
| 3961 | TCCCTGTGCC  | AGCCCTGCAC | CACCCAGTGT  | TCCAGCAGGA  | GAGCTTTACC | CGCCAGGTGC  |
| 4021 | TGTGGAAACT  | GCTGAAAGTG | GTGAAAGTTCG | GAGAGGTCAT  | CAGCTACAGC | CACCTGGCCG  |
| 4081 | CCCTGGCCGG  | CAATCCCGCC | GCCACCGCCG  | CCGTGAAAAC  | CGCCCTGAGC | GGAAATCCCC  |
| 4141 | TGCCCATTTCT | GATCCCCTGC | CACCGGGTGG  | TGCAGGGCGA  | CCTGGACGTG | GGGGGCTACG  |
| 4201 | AGGGCGGGCT  | CGCCGTGAAA | GAGTGGCTGC  | TGGCCACGA   | GGGCCACAGA | CTGGGCAAGC  |
| 4261 | CTGGGCTGGG  | TCCTGCAGGC | GGAGGCGCGC  | CAGGGTCTGG  | CGGCGGCAGT | AAGGCAGAAC  |
| 4321 | GCATGGGTTT  | CACAGAGGTA | ACCCCAGTGA  | CAGGGGCCAG  | TCTCAGAAGA | ACTATGCTCC  |
| 4381 | TCCTCTCAAG  | GTCCCCAGAA | GCACAGCCAA  | AGACACTCCC  | TCTCACTGGC | AGCACCTTCC  |
| 4441 | ATGACCAGAT  | AGCCATGCTG | AGCCACCGGT  | GCTTCAACAC  | TCTGACTAAC | AGCTTCCAGC  |
| 4501 | CCTCCTTGCT  | CGGCCGCAAG | ATTCTGGCCG  | CCATCATTAT  | GAAAAAAGAC | TCTGAGGACA  |
| 4561 | TGGGTGTCTG  | CGTCAGCTTG | GGAACAGGGA  | ATCGCTGTGT  | AAAAGGAGAT | TCTCTCAGCC  |
| 4621 | TAAAAGGAGA  | AACTGTCAAT | GACTGCCATG  | CAGAAATAAT  | CTCCCGGAGA | GGCTTCATCA  |

|      |            |             |             |             |             |             |
|------|------------|-------------|-------------|-------------|-------------|-------------|
| 4681 | GGTTTCTCTA | CAGTGAGTTA  | ATGAAATACA  | ACTCCCAGAC  | TGCGAAGGAT  | AGTATATTTG  |
| 4741 | AACCTGCTAA | GGGAGGAGAA  | AAGCTCCAAA  | TAAAAAAGAC  | TGTGTCATTC  | CATCTGTATA  |
| 4801 | TCAGCACTGC | TCCGTGTGGA  | GATGGCGCCC  | TCTTTGACAA  | GTCCGTGCAGC | GACCGTGCCTA |
| 4861 | TGGAAAGCAC | AGAATCCCCG  | CACTACCCTG  | TCTTCGAGAA  | TCCCAAACAA  | GGAAAGCTCC  |
| 4921 | GCACCAAGGT | GGAGAACGGA  | CAAGGCACAA  | TCCCTGTGGA  | ATCCAGTGAC  | ATTGTGCCTA  |
| 4981 | CGTGGGATGG | CATTTCGGCTC | GGGGAGAGAC  | TCCGTACCAT  | GTCCGTGTAGT | GACAAAATCC  |
| 5041 | TACGCTGGAA | CGTGCTGGGC  | CTGCAAGGGG  | CACTGTTGAC  | CCACTTCCTG  | CAGCCCATTT  |
| 5101 | ATCTCAAATC | TGTCACATTG  | GGTTACCTTT  | TCAGCCAAGG  | GCATCTGACC  | CGTGCTATTT  |
| 5161 | GCTGTTCGTG | GACAAGAGAT  | GGGAGTGCAT  | TTGAGGATGG  | ACTACGACAT  | CCCTTTATTTG |
| 5221 | TCAACCACCC | CAAGGTTGGC  | AGATCAGCA   | TATATGATTC  | CAAAAAGGCAA | TCCGGGAAGA  |
| 5281 | CTAAGGAGAC | AAGCGTCAAC  | TGGTGTCTGG  | CTGATGGCTA  | TGACCTGGAG  | ATCCTGGACG  |
| 5341 | GTACCAGAGG | CACTGTGGAT  | GGGCCACGGA  | ATGAATTGTC  | CCGGGTCTCC  | AAAAAGAACA  |
| 5401 | TTTTTCTTCT | ATTTAAGAAG  | CTCTGCTCCT  | TCCGTTACCG  | CAGGGATCTA  | CTGAGACTCT  |
| 5461 | CCTATGGTGA | GGCCAAGAAA  | GCTGCCCGTG  | ACTACGAGAC  | GGCCAAGAAC  | TACTTCAAAA  |
| 5521 | AAGGCCTGAA | GGATATGGGC  | TATGGGAACT  | GGATTAGCAA  | ACCCAGGAG   | GAAAAGAACT  |
| 5581 | TTTATCTCTG | CCCAGTATAA  | GTTTAAACCT  | GCTGATCAGC  | CTCGACTGTG  | CCTTCTAGTC  |
| 5641 | GACCCTGTGG | AATGTGTGTC  | AGTTAGGGTG  | TGGAAAAGTCC | CCAGGCTCCC  | CAGCAGGCAG  |
| 5701 | AAGTATGCAA | AGCATGCATC  | TCAATTAGTC  | AGCAACCAGG  | TGTGGAAAGT  | CCCCAGGCTC  |
| 5761 | CCCAGCAGGC | AGAAGTATGC  | AAAGCATGCA  | TCTCAATTAG  | TCAGCAACCA  | TAGTCCC GCC |
| 5821 | CCTAACTCCG | CCCATCCCCG  | CCCTAACTCC  | GCCCAGTTCC  | GCCCATTCTC  | CGCCCCATGG  |
| 5881 | CTGACTAATT | TTTTTTATTT  | ATGCAGAGGC  | CGAGGCCGCC  | TCGGCCTCTG  | AGCTATTCCA  |
| 5941 | GAAGTAGTGA | GGAGGCTTTT  | TTGGAGGCCCT | AGGCTTTTGC  | AAAAAGCTTA  | CCATGACCGA  |
| 6001 | GTACAAGCCC | ACGGTGCGCC  | TCGCCACCCG  | CGACGACGTC  | CCCAGGGCCG  | TACGCACCCT  |
| 6061 | CGCCGCCGCG | TTCGCCGACT  | ACCCGCCAC   | GCGCCACACC  | GTCGATCCGG  | ACCGCCACAT  |
| 6121 | CGAGCGGGTC | ACCGAGCTGC  | AAGAACTCTT  | CCTCACGCGC  | GTCGGGCTCG  | ACATCGGCAA  |
| 6181 | GGTGTGGGTC | GCGGACGACG  | GCGCCGCGGT  | GGCGGTCTGG  | ACCACGCCGG  | AGAGCGTCGA  |
| 6241 | AGCGGGGCGC | GTGTTCCGCC  | AGATCGGCC   | GCGCATGGCC  | GAGTTGAGCG  | GTTCCC GGCT |
| 6301 | GGCCGGGCAG | CAACAGATGG  | AAGGCCCTCC  | GCGCCCGCAC  | CGGCCCAAGG  | CGGCCCGGTG  |
| 6361 | GTTCTCGGCC | ACCGTCGGCG  | TCTCGCCCGA  | CCACCAGGGC  | AAGGGTCTGG  | GCAGCGCCGT  |
| 6421 | CGTGCTCCCC | GGAGTGGAGG  | CGGCCGAGCG  | CGCCGGGGTG  | CCCGCCTTCC  | TGGAGACCTC  |
| 6481 | CGCGCCCCGC | AACCTCCCCCT | TCTACGAGCG  | GCTCGGCTTC  | ACCGTCACCG  | CCGACGTCGA  |
| 6541 | GTGCCCGAAG | GACCGCGCGA  | CCTGGTGCAT  | GACCCGCAAG  | CCCGGTGCCT  | GAGGTACCTT  |
| 6601 | TAAGACCAAT | GACTTACAAG  | GCAGCTGTAG  | ATCTTAGCCA  | CTTTTTAAAA  | GAAAAGGGGG  |
| 6661 | GACTGGAAGG | GCTAATTCAC  | TCCCAACGAA  | GACAAGATCT  | GCTTTTTTGT  | TGTACTGGGT  |
| 6721 | CTCTCTGGTT | AGACCAGATC  | TGAGCCTGGG  | AGCTCTCTGG  | CTAACTAGGG  | AACCCACTGC  |
| 6781 | TTAAGCCTCA | ATAAAGCTTG  | CCTTGAGTGC  | TTCAAGTAGT  | GTGTGCCCGT  | CTGTTGTGTG  |
| 6841 | ACTCTGGTAA | CTAGAGATCC  | CTCAGACCCCT | TTTAGTCAGT  | GTGGAATAATC | TCTAGCAGTA  |
| 6901 | GTAGTTCATG | TCATCTTATT  | ATTCAGTATT  | TATAACTTGC  | AAAGAAATGA  | ATATCAGAGA  |
| 6961 | GTGAGAGGAA | CTTGTTTATT  | GCAGCTTATA  | ATGGTTACAA  | ATAAAGCAAT  | AGCATCACAA  |
| 7021 | ATTTACAAAA | TAAAGCATTT  | TTTTCACTGC  | ATTCTAGTTG  | TGGTTTGTCC  | AAACTCATCA  |
| 7081 | ATGTATCTTA | TCATGTCTGG  | CTCTAGCTAT  | CCCGCCCTA   | ACTCCGCCCA  | TCCCGCCCT   |
| 7141 | AACTCCGCC  | AGTTCGCC    | ATTCTCCGCC  | CCATGGCTGA  | CTAATTTTTT  | TTATTTATGC  |
| 7201 | AGAGGCCGAG | GCCGCTCGG   | CCTCTGAGCT  | ATTCCAGAAG  | TAGTGAGGAG  | GCTTTTTTGG  |
| 7261 | AGGCCTAGGG | ACGTACCAA   | TTCGCCCTAT  | AGTGAGTCGT  | ATTACGCGCG  | CTCACTGGCC  |
| 7321 | GTCGTTTTAC | AACGTCGTGA  | CTGGGAAAAA  | CCTGGCGTTA  | CCCAACTTAA  | TGCCTTGCA   |
| 7381 | GCACATCCCC | CTTTCGCCAG  | CTGGCGTAAT  | AGCGAAGAGG  | CCGCACCGA   | TCGCCCTTCC  |
| 7441 | CAACAGTTGC | GCAGCCTGAA  | TGGCGAATGG  | GACGCGCCCT  | GTAGCGGCGC  | ATTAAGCGCG  |
| 7501 | GCGGGTGTGG | TGGTTACGCG  | CAGCGTGACC  | GCTACACTTG  | CCAGCGCCCT  | AGCGCCCGCT  |
| 7561 | CCTTTCGCTT | TCTTCCCTTC  | CTTTCGCGC   | ACGTTCCGCC  | GCTTTCGCCG  | TCAAGCTCTA  |
| 7621 | AATCGGGGGC | TCCCTTTAGG  | GTTCCGATTT  | AGTGCTTTAC  | GGCACCTCGA  | CCCCAAAAAA  |
| 7681 | CTTGATTAGG | GTGATGGTTC  | ACGTAGTGGG  | CCATCGCCCT  | GATAGACGGT  | TTTTCGCCCT  |
| 7741 | TTGACGTTGG | AGTCCACGTT  | CTTTAATAGT  | GGACTCTTGT  | TCCAAACTGG  | AACAACACTC  |
| 7801 | AACCCTATCT | CGGTCTATTC  | TTTTGATTTA  | TAAGGGATTT  | TGCCGATTTT  | GGCCTATTGG  |
| 7861 | TTAAAAAATG | AGCTGATTTA  | ACAAAAATTT  | AACGCGAATT  | TTAACAAAAT  | ATTAACGCTT  |
| 7921 | ACAATTTAGG | TGGCACTTTT  | CGGGGAAATG  | TGCGCGGAAC  | CCCTATTTGT  | TTATTTTTCT  |
| 7981 | AAATACATTC | AAATATGTAT  | CCGCTCATGA  | GACAATAACC  | CTGATAAATG  | CTTCAATAAT  |
| 8041 | ATTGAAAAAG | GAAGAGTATG  | AGTATTCAAC  | ATTTCCGTGT  | CGCCCTTATT  | CCTTTTTTTTG |
| 8101 | CGGCATTTTG | CCTTCTGTG   | TTTGCTCACC  | CAGAAAACGCT | GGTAAAAGTA  | AAAGATGCTG  |
| 8161 | AAGATCAGTT | GGGTGCACGA  | GTGGGTTACA  | TCGAACTGGA  | TCTCAACAGC  | GGTAAGATCC  |
| 8221 | TTGAGAGTTT | TCGCCCCGAA  | GAACGTTTTC  | CAATGATGAG  | CACTTTTAAA  | GTTCTGCTAT  |
| 8281 | GTGGCGCGGT | ATTATCCCGT  | ATTGACGCCG  | GGCAAGAGCA  | ACTCGGTCCG  | CGCATAACT   |

8341 ATTCTCAGAA TGACTTGGTT GAGTACTCAC CAGTCACAGA AAAGCATCTT ACGGATGGCA  
8401 TGACAGTAAG AGAATTATGC AGTGCTGCCA TAACCATGAG TGATAACACT GCGGCCAACT  
8461 TACTTCTGAC AACGATCGGA GGACCGAAGG AGCTAACCGC TTTTTTGCAC AACATGGGGG  
8521 ATCATGTAAC TCGCCTTGAT CGTTGGGAAC CGGAGCTGAA TGAAGCCATA CCAAACGACG  
8581 AGCGTGACAC CACGATGCCT GTAGCAATGG CAACAACGTT GCGCAAACATA TTAACCTGGCG  
8641 AACTACTTAC TCTAGCTTCC CGGCAACAAT TAATAGACTG GATGGAGGCG GATAAAGTTG  
8701 CAGGACCACT TCTGCGCTCG GCCCTTCCGG CTGGCTGGTT TATTGCTGAT AAATCTGGAG  
8761 CCGGTGAGCG TGGGTCTCGC GGTATCATTG CAGCACTGGG GCCAGATGGT AAGCCCTCCC  
8821 GTATCGTAGT TATCTACACG ACGGGGAGTC AGGCAACTAT GGATGAACGA AATAGACAGA  
8881 TCGTGAGAT AGGTGCCTCA CTGATTAAGC ATTGGTAACT GTCAGACCAA GTTTACTCAT  
8941 ATATACTTTA GATTGATTTA AAACCTCATT TTTAATTTAA AAGGATCTAG GTGAAGATCC  
9001 TTTTTGATAA TCTCATGACC AAAATCCCTT AACGTGAGTT TTCGTTCCAC TGAGCGTCAG  
9061 ACCCCGTAGA AAAGATCAAA GGATCTTCTT GAGATCCTTT TTTTCTGCGC GTAATCTGCT  
9121 GCTTGCAAAC AAAAAAACCA CCGCTACCAG CGGTGGTTTG TTTGCCGGAT CAAGAGCTAC  
9181 CAACTCTTTT TCCGAAGGTA ACTGGCTTCA GCAGAGCGCA GATACCAAAT ACTGTTCTTC  
9241 TAGTGTAGCC GTAGTTAGGC CACCACTTCA AGAACTCTGT AGCACCGCCT ACATACCTCG  
9301 CTCTGCTAAT CCTGTTACCA GTGGCTGCTG CCAGTGGCGA TAAGTCGTGT CTTACCGGGT  
9361 TGGACTCAAG ACGATAGTTA CCGGATAAGG CGCAGCGGTC GGGCTGAACG GGGGGTTCGT  
9421 GCACACAGCC CAGCTTGGAG CGAACGACCT ACACCGAACT GAGATACCTA CAGCGTGAGC  
9481 TATGAGAAAG CGCCACGCTT CCCGAAGGGA GAAAGGCGGA CAGGTATCCG GTAAGCGGCA  
9541 GGGTCGGAAC AGGAGAGCGC ACGAGGGAGC TTCCAGGGGG AAACGCCTGG TATCTTTATA  
9601 GTCCTGTCCG GTTTCGCCAC CTCTGACTTG AGCGTCGATT TTTGTGATGC TCCTCAGGGG  
9661 GGCGGAGCCT ATGGAAAAAC GCCAGCAACG CGGCCTTTTT ACGGTTCCCTG GCCTTTTGCT  
9721 GGCCTTTTGC TCACATGTTT TTTCTGCGT TATCCCCTGA TTCTGTGGAT AACCGTATTA  
9781 CCGCCTTTGA GTGAGCTGAT ACCGCTCGCC GCAGCCGAAC GACCGAGCGC AGCGAGTCAG  
9841 TGAGCGAGGA AGCGGAAGAG CGCCCAATAC GCAAACCGCC TCTCCCCCGC CGTTGGCCGA  
9901 TTCATTAATG CAGCTGGCAC GACAGGTTTC CCGACTGGAA AGCGGGCAGT GAGCGCAACG  
9961 CAATTAATGT GAGTTAGCTC ACTCATTAGG CACCCAGGC TTTACACTTT ATGCTTCCGG  
10021 CTCGTATGTT GTGTGGAATT GTGAGCGGAT AACAAATTTCA CACAGGAAAC AGCTATGACC  
10081 ATGATTACGC CAAGCGCGCA ATTAACCTC ACTAAAGGGA ACAAAGCTG GAGCTGCAAG  
10141 CTT

Plasmid-map and sequence of EF1A\_GFP\_SA1\_pLentiPuro (pTS1036):

Created with SnapGene®

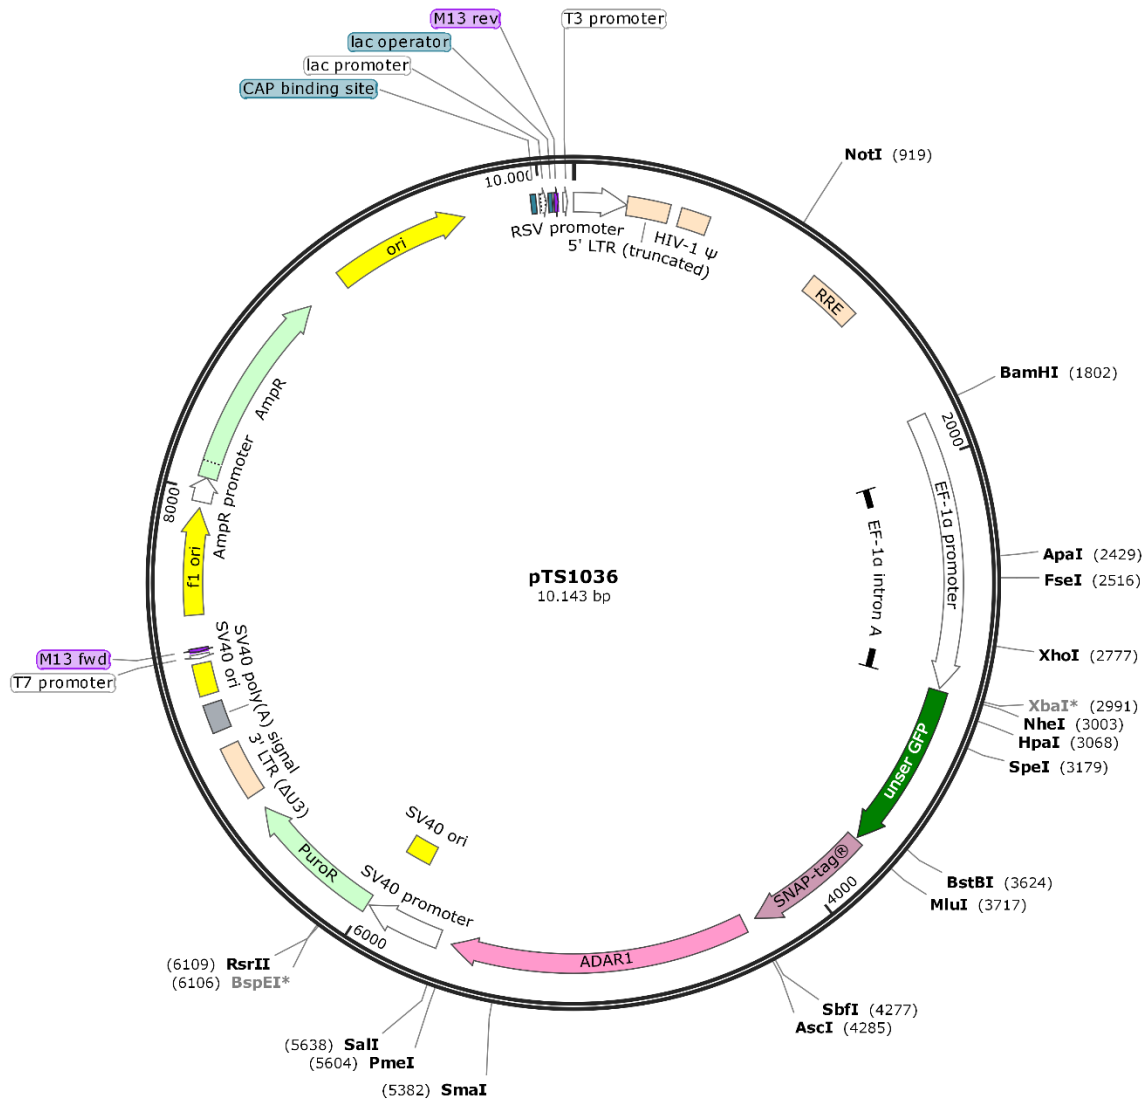

```

1      ATGTAGTCTT  ATGCAATACT  CTTGTAGTCT  TGCAACATGG  TAACGATGAG  TTAGCAACAT
61     GCCTTACAAG  GAGAGAAAAA  GCACCGTGCA  TGCCGATTGG  TGGAAAGTAAG  GTGGTACGAT
121    CGTGCCTTAT  TAGGAAGGCA  ACAGACGGGT  CTGACATGGA  TTGGACGAAC  CACTGAATTG
181    CCGCATTGCA  GAGATATTGT  ATTTAAGTGC  CTAGCTCGAT  ACATAAACGG  GTCTCTCTGG
241    TTAGACCAGA  TCTGAGCCTG  GGAGCTCTCT  GGCTAACTAG  GGAACCCACT  GCTTAAGCCT
301    CAATAAAGCT  TGCCTTGAGT  GCTTCAAGTA  GTGTGTGCC  GTCTGTTGTG  TGACTCTGGT
361    AACTAGAGAT  CCCTCAGACC  CTTTTAGTCA  GTGTGGAAAA  TCTCTAGCAG  TGGCGCCCGA
421    ACAGGGACTT  GAAAGCGAAA  GGGAAACCAG  AGGAGCTCTC  TCGACGCAGG  ACTCGGCTTG
481    CTGAAGCGCG  CACGGCAAGA  GGCGAGGGGC  GGCGACTGGT  GAGTACGCCA  AAAATTTTGA
541    CTAGCGGAGG  CTAGAAGGAG  AGAGATGGGT  GCGAGAGCGT  CAGTATTAAG  CGGGGGAGAA
601    TTAGATCGCG  ATGGGAAAAA  ATTCGGTTAA  GGCCAGGGGG  AAAGAAAAAA  TATAAATTA
661    AACATATAGT  ATGGGCAAGC  AGGGAGCTAG  AACGATTCGC  AGTTAATCCT  GGCCGTGTAG
721    AAACATCAGA  AGGCTGTAGA  CAAATACTGG  GACAGCTACA  ACCATCCCTT  CAGACAGGAT
    
```

|      |             |             |             |             |             |            |
|------|-------------|-------------|-------------|-------------|-------------|------------|
| 781  | CAGAAGAACT  | TAGATCATTA  | TATAATACAG  | TAGCAACCCT  | CTATTGTGTG  | CATCAAAGGA |
| 841  | TAGAGATAAA  | AGACACCAAG  | GAAGCTTTAG  | ACAAGATAGA  | GGAAGAGCAA  | AACAAAAGTA |
| 901  | AGACCACCGC  | ACAGCAAGCG  | GCCGCTGATC  | TTCAGACCTG  | GAGGAGGAGA  | TATGAGGGAC |
| 961  | AATTGGAGAA  | GTGAATTATA  | TAAATATAAA  | GTAGTAAAAA  | TTGAACCATT  | AGGAGTAGCA |
| 1021 | CCCACCAAGG  | CAAAGAGAAAG | AGTGGTGCAG  | AGAGAAAAAA  | GAGCAGTGGG  | AATAGGAGCT |
| 1081 | TTGTTCTTGG  | GGTTCCTGGG  | AGCAGCAGGA  | AGCACTATGG  | GCGCAGCGTC  | AATGACGCTG |
| 1141 | ACGGTACAGG  | CCAGACAATT  | ATTGTCTGGT  | ATAGTGCAGC  | AGCAGAACAA  | TTTGCTGAGG |
| 1201 | GCTATTGAGG  | CGCAACAGCA  | TCTGTTGCAA  | CTCACAGTCT  | GGGGCATCAA  | GCAGCTCCAG |
| 1261 | GCAAGAATCC  | TGGCTGTGGA  | AAGATACCTA  | AAGGATCAAC  | AGCTCCTGGG  | GATTTGGGGT |
| 1321 | TGCTCTGGAA  | AACTCATTGG  | CACCACCTGT  | GTGCCTTGGA  | ATGCTAGTTG  | GAGTAATAAA |
| 1381 | TCTCTGGAAC  | AGATTTGGAA  | TCACACGACC  | TGGATGGAGT  | GGGACAGAGA  | AATTAACAAT |
| 1441 | TACACAAGCT  | TAATACACTC  | CTTAATTGAA  | GAATCGCAA   | ACCAGCAAGA  | AAAGAATGAA |
| 1501 | CAAGAATTAT  | TGGAATTAGA  | TAAATGGGCA  | AGTTTGTGGA  | ATTGGTTTTAA | CATAACAAAT |
| 1561 | TGGCTGTGGT  | ATATAAAAATT | ATTCATAATG  | ATAGTAGGAG  | GCTTGGTAGG  | TTTAAGAATA |
| 1621 | GTTTTTGTCTG | TACTTTCTAT  | AGTGAATAGA  | GTTAGGCAGG  | GATATTCACC  | ATTATCGTTT |
| 1681 | CAGACCCACC  | TCCCAACCCC  | GAGGGGACCC  | GACAGGCCCG  | AAGGAATAGA  | AGAAGAAGGT |
| 1741 | GGAGAGAGAG  | ACAGAGACAG  | ATCCATTCTGA | TTAGTGAACG  | GATCTCGACG  | GTATCGCTAG |
| 1801 | TGGATCCGTG  | AGGCTCCGGT  | GCCCGTCAGT  | GGGCAGAGCG  | CACATCGCCC  | ACAGTCCCCG |
| 1861 | AGAAGTTGGG  | GGGAGGGGTC  | GGCAATTGAA  | CCGGTGCCTA  | GAGAAGGTGG  | CGCGGGGTAA |
| 1921 | ACTGGGAAAG  | TGATGTCGTG  | TACTGGCTCC  | GCCTTTTTTCC | CGAGGTGGG   | GGAGAACCGT |
| 1981 | ATATAAGTGC  | AGTAGTCGCC  | GTGAACGTTT  | TTTTTTCGCAA | CGGGTTTGCC  | GCCAGAACAC |
| 2041 | AGGTAAGTGC  | CGTGTGTGGT  | TCCCGCGGGC  | CTGGCCTCTT  | TACGGGTTAT  | GGCCCTTGCG |
| 2101 | TGCCTTGAAT  | TACTTCCACC  | TGGCTGCAGT  | ACGTGATTCT  | TGATCCCGAG  | CTTCGGGTTG |
| 2161 | GAAGTGGGTG  | GGAGAGTTCG  | AGGCCTTGCG  | CTTAAGGAGC  | CCCTTCGCCT  | CGTGCTTGAG |
| 2221 | TTGAGGCCTG  | GCCTGGGCGC  | TGGGGCCGCC  | GCGTGCGAAT  | CTGGTGGCAC  | CTTCGCGCCT |
| 2281 | GTCTCGCTGC  | TTTCGATAAG  | TCTCTAGCCA  | TTTAAAAATTT | TTGATGACCT  | GCTGCGACGC |
| 2341 | TTTTTTTCTG  | GCAAGATAGT  | CTTGTAATG   | CGGGCCAAGA  | TCTGCACACT  | GGTATTTCCG |
| 2401 | TTTTTGGGGC  | CGCGGGCGGC  | GACGGGGCCC  | TGCGCTCCCA  | GCGCATAGT   | TCCGATAGGC |
| 2461 | GGGGCCTGCG  | AGCGCGGCCA  | CCGAGAATCG  | GACGGGGGTA  | GTCTCAAGCT  | GGCCGGCCTG |
| 2521 | CTCTGGTGCC  | TGGCCTCGCG  | CCGCCGTGTA  | TCGCCCCGCC  | CTGGGCGGCA  | AGGCTGGCCC |
| 2581 | GGTCGGCACC  | AGTTGCGTGA  | GCGGAAAAGAT | GGCCGCTTCC  | CGGCCCTGCT  | GCAGGGAGCT |
| 2641 | CAAAATGGAG  | GACGCGGCGC  | TCGGGAGAGC  | GGGCGGGTGA  | GTCACCCACA  | CAAAGGAAAA |
| 2701 | GGGCCTTTCC  | GTCCCTCAGC  | GTCGCTTCAT  | GTGACTCCAC  | GGAGTACCGG  | GCGCCGTCCA |
| 2761 | GGCACCTCGA  | TTAGTTCTCG  | AGCTTTTGGG  | GTACGTCGTC  | TTTAGGTTGG  | GGGGAGGGGT |
| 2821 | TTTATGCGAT  | GGAGTTTCCC  | CACACTGAGT  | GGGTGGAGAC  | TGAAGTTAGG  | CCAGCTTGCC |
| 2881 | ACTTGATGTA  | ATTCTCCTTG  | GAATTTGCC   | TTTTTGTAGT  | TGGATCTTGG  | TTCATTCTCA |
| 2941 | AGCCTCAGAC  | AGTGGTTCAA  | AGTTTTTTTTC | TTCCATTTCA  | GGTGTCTGTA  | TCTAGAACCA |
| 3001 | TGGCTAGCAA  | AGGAGAAGAA  | CTCTTCACTG  | GAGTTGTCCC  | AATTCCTGTT  | GAATTAGATG |
| 3061 | GTGATGTTAA  | CGGCCACAAG  | TTCTCTGTCA  | GTGGAGAGGG  | TGAAGGTGAT  | GCAACATACG |
| 3121 | GAAAACCTTAC | CCTGAAGTTC  | ATCTGCACTA  | CTGGCAAAC   | GCCTGTTCCG  | TGGCCGACAC |
| 3181 | TAGTGACGAC  | GCTCTGCTAT  | GGCGTCCAGT  | GCTTTTCAAG  | ATACCCGGAT  | CACATGAAAC |
| 3241 | GGCATGACTT  | TTTCAAGAGT  | GCCATGCCCC  | AAGGTTATGT  | ACAGGAAAGG  | ACCATCTTCT |
| 3301 | TCAAAGATGA  | CGGCAACTAC  | AAGACACGTG  | CTGAAGTCAA  | GTTTGAAGGT  | GATACCCTTG |
| 3361 | TTAATAGAAT  | CGAGTTAAAA  | GGTATTGACT  | TCAAGGAAGA  | TGGCAACATT  | CTGGGACACA |
| 3421 | AATTGGAATA  | CAACTATAAC  | TCACACAATG  | TATACATCAT  | GGCAGACAAA  | CAAAAAGATG |
| 3481 | GAATCAAAGT  | GAACCTCAAG  | ACCCGCCACA  | ACATTGAAGA  | TGGAAGCGTT  | CAACTAGCAG |
| 3541 | ACCATTATCA  | ACAAAATACT  | CCAATTGGCG  | ATGGCCCTGT  | CCTTTTACCA  | GACAACCATT |
| 3601 | ACCTGTCCAC  | ACAATCTGCC  | CTTTCGAAAAG | ATCCCAACGA  | AAAGAGAGAC  | CACATGGTCC |
| 3661 | TTCTTGAGTT  | TGTAACAGCT  | GCTGGGATTA  | CACATGGCAT  | GGATGAACTA  | TACAAAACGC |
| 3721 | GTACCATGGA  | CAAAGACTGC  | GAAATGAAGC  | GCACCACCCT  | GGATAGCCCT  | CTGGGCAAGC |
| 3781 | TGGAACTGTC  | TGGGTGCGAA  | CAGGGCCTGC  | ACCGTATCAT  | CTTCCTGGGC  | AAAGGAACAT |
| 3841 | CTGCCGCCGA  | CGCCGTGGAA  | GTGCCTGCC   | CAGCCGCCGT  | GCTGGGCGGA  | CCAGAGCCAC |
| 3901 | TGATGCAGGC  | CACCGCCTGG  | CTCAACGCCT  | ACTTTCACCA  | GCCTGAGGCC  | ATCGAGGAGT |
| 3961 | TCCCTGTGCC  | AGCCCTGCAC  | CACCCAGTGT  | TCCAGCAGGA  | GAGCTTTACC  | CGCCAGGTGC |
| 4021 | TGTGGAAACT  | GCTGAAAGTG  | GTGAAGTTCG  | GAGAGGTCAT  | CAGCTACAGC  | CACCTGGCCG |
| 4081 | CCCTGGCCGG  | CAATCCC GCC | GCCACCGCCG  | CCGTGAAAAC  | CGCCCTGAGC  | GGAAATCCC  |
| 4141 | TGCCCATTTCT | GATCCCCTGC  | CACCGGGTGG  | TGCAGGGCGA  | CCTGGACGTG  | GGGGGCTACG |
| 4201 | AGGGCGGGCT  | CGCCGTGAAA  | GAGTGGCTGC  | TGGCCCACGA  | GGGCCACAGA  | CTGGGCAAGC |
| 4261 | CTGGGCTGGG  | TCCTGCAGGC  | GGAGGCGCGC  | CAGGGTCTGG  | CGGCGGCAGT  | AAGGCAGAAC |
| 4321 | GCATGGGTTT  | CACAGAGGTA  | ACCCAGTGA   | CAGGGGCCAG  | TCTCAGAAGA  | ACTATGCTCC |
| 4381 | TCCTCTCAAG  | GTCCCCAGAA  | GCACAGCCAA  | AGACACTCCC  | TCTCACTGGC  | AGCACCTTCC |

|      |            |             |             |             |             |             |
|------|------------|-------------|-------------|-------------|-------------|-------------|
| 4441 | ATGACCAGAT | AGCCATGCTG  | AGCCACCGGT  | GCTTCAACAC  | TCTGACTAAC  | AGCTTCCAGC  |
| 4501 | CCTCCTTGCT | CGGCCGCAAG  | ATTCTGGCCG  | CCATCATTAT  | GAAAAAAGAC  | TCTGAGGACA  |
| 4561 | TGGGTGTCTG | CGTCAGCTTG  | GGAACAGGGA  | ATCGCTGTGT  | AAAAGGAGAT  | TCTCTCAGCC  |
| 4621 | TAAAAGGAGA | AACTGTCAAT  | GACTGCCATG  | CAGAAATAAT  | CTCCCGGAGA  | GGCTTCATCA  |
| 4681 | GGTTTCTCTA | CAGTGAGTTA  | ATGAAATACA  | ACTCCCAGAC  | TGCGAAGGAT  | AGTATATTTG  |
| 4741 | AACCTGCTAA | GGGAGGAGAA  | AAGCTCCAAA  | TAAAAAAGAC  | TGTGTCAATC  | CATCTGTATA  |
| 4801 | TCAGCACTGC | TCCGTGTGGA  | GATGGCGCCC  | TCTTTGACAA  | GTCCTGCAGC  | GACCGTGCTA  |
| 4861 | TGGAAAGCAC | AGAATCCC GC | CACTACCCTG  | TCTTCGAGAA  | TCCCAAACAA  | GGAAAGCTCC  |
| 4921 | GCACCAAGGT | GGAGAACGGA  | GAAGGCACAA  | TCCCTGTGGA  | ATCCAGTGAC  | ATTGTGCCTA  |
| 4981 | CGTGGGATGG | CATTCCGCTC  | GGGGAGAGAC  | TCCGTACCAT  | GTCCTGTAGT  | GACAAAATCC  |
| 5041 | TACGCTGGAA | CGTGCTGGGC  | CTGCAAGGGG  | CAGTGTTCAG  | CACTTCTCTG  | CAGCCCATTT  |
| 5101 | ATCTCAAATC | TGTCACATTG  | GGTTACCTTT  | TCAGCCAAGG  | GCATCTGACC  | CGTGCATTTT  |
| 5161 | GCTGTCTGTG | GACAAGAGAT  | GGGAGTGCAT  | TTGAGGATGG  | ACTACGACAT  | CCTTTTATTG  |
| 5221 | TCAACCACCC | CAAGGTGCGC  | AGAGTCAGCA  | TATATGATTC  | CAAAAGGCAA  | TCCGGGAAGA  |
| 5281 | CTAAGGAGAC | AAGCGTCAAC  | TGGTGTCTGG  | CTGATGGCTA  | TGACCTGGAG  | ATCCTGGACG  |
| 5341 | GTACCAGAGG | CACTGTGGAT  | GGGCCACGGA  | ATGAATTGTC  | CCGGGTCTCC  | AAAAAGAACA  |
| 5401 | TTTTTCTTCT | ATTTAAGAAG  | CTCTGCTCCT  | TCCGTTACCG  | CAGGGATCTA  | CTGAGACTCT  |
| 5461 | CCTATGGTGA | GGCCAAGAAA  | GCTGCCCGTG  | ACTACGAGAC  | GGCCAAGAAC  | TACTTCAAAA  |
| 5521 | AAGGCCTGAA | GGATATGGGC  | TATGGGAAC   | GGATTAGCAA  | ACCCAGGAG   | GAAAAGAACT  |
| 5581 | TTTATCTCTG | CCCAGTATAA  | GTTTAAACCT  | GCTGATCAGC  | CTCGACTGTG  | CCTTCTAGTC  |
| 5641 | GACCCTGTGG | AATGTGTGTC  | AGTTAGGGTG  | TGGAAAAGTCC | CCAGGCTCCC  | CAGCAGGCAG  |
| 5701 | AAGTATGCAA | AGCATGCATC  | TCAATTAGTC  | AGCAACCAGG  | TGTGGAAAGT  | CCCCAGGCTC  |
| 5761 | CCCAGCAGGC | AGAAGTATGC  | AAAGCATGCA  | TCTCAATTAG  | TCAGCAACCA  | TAGTCCC GCC |
| 5821 | CCTAACTCCG | CCCATCCC GC | CCCTAACTCC  | GCCCAGTTCC  | GCCCATTCTC  | CGCCCCATGG  |
| 5881 | CTGACTAATT | TTTTTTATTT  | ATGCAGAGGC  | CGAGGCCGCC  | TCGGCCTCTG  | AGCTATTCCA  |
| 5941 | GAAGTAGTGA | GGAGGCTTTT  | TTGGAGGCC   | AGGCTTTTGC  | AAAAAGCTTA  | CCATGACCGA  |
| 6001 | GTACAAGCCC | ACGGTGCGCC  | TCGCCACCCG  | CGACGACGTC  | CCCAGGGCGT  | TACGCCACCT  |
| 6061 | CGCCGCGCG  | TTCCGCCACT  | ACCCCGCCAC  | CGCCACACC   | GTCGATCCGG  | ACCGCCACAT  |
| 6121 | CGAGCGGGTC | ACCGAGCTGC  | AAGAACTCTT  | CCTCACGCGC  | GTCGGGCTCG  | ACATCGGCAA  |
| 6181 | GGTGTGGGTC | GCGGACGACG  | GCGCCGCGGT  | GGCGGTCTGG  | ACCACGCCGG  | AGAGCGTCGA  |
| 6241 | AGCGGGGGCG | GTGTTCCGCC  | AGATCGGCC   | GCGCATGGCC  | GAGTTGAGCG  | GTTCCCGGCT  |
| 6301 | GGCCGCGCAG | CAACAGATGG  | AAGGCCTCCT  | GGCGCCGCAC  | CGGCCCAAGG  | AGCCCGCGTG  |
| 6361 | GTTCTCGGCC | ACCGTCGGCG  | TCTCGCCCGA  | CCACCAGGGC  | AAGGGTCTGG  | GCAGCGCCGT  |
| 6421 | CGTGCTCCCC | GGAGTGGAGG  | CGGCCGAGCG  | CGCCGGGGTG  | CCCGCCTTCC  | TGGAGACCTC  |
| 6481 | CGCGCCCCGC | AACCTCCCCT  | TCTACGAGCG  | GCTCGGCTTC  | ACCGTCACCG  | CCGACGTCGA  |
| 6541 | GTGCCCGAAG | GACCGCGCGA  | CCTGGTGCAT  | GACCCGCAAG  | CCCGGTGCCT  | GAGGTACCTT  |
| 6601 | TAAGACCAAT | GACTTACAAG  | GCAGCTGTAG  | ATCTTAGCCA  | CTTTTTAAAA  | GAAAAGGGGG  |
| 6661 | GACTGGAAGG | GCTAATTAC   | TCCCAACGAA  | GACAAGATCT  | GCTTTTTTGCT | TGTACTGGGT  |
| 6721 | CTCTCTGGTT | AGACCAGATC  | TGAGCCTGGG  | AGCTCTCTGG  | CTAACTAGGG  | AACCCACTGC  |
| 6781 | TTAAGCCTCA | ATAAAGCTTG  | CCTTGAGTGC  | TTCAAGTAGT  | GTGTGCCCGT  | CTGTTGTGTG  |
| 6841 | ACTCTGGTAA | CTAGAGATCC  | CTCAGACCCT  | TTTAGTCACT  | GTGGAAAATC  | TCTAGCAGTA  |
| 6901 | GTAGTTCATG | TCATCTTATT  | ATTCAGTATT  | TATAACTTGC  | AAAGAAAATGA | ATATCAGAGA  |
| 6961 | GTGAGAGGAA | CTTGTTTATT  | GCAGCTTATA  | ATGGTTACAA  | ATAAAGCAAT  | AGCATCACAA  |
| 7021 | ATTTACAAAA | TAAAGCATT   | TTTTACTGTC  | ATTCTAGTTG  | TGGTTTGTCC  | AAACTCATCA  |
| 7081 | ATGTATCTTA | TCATGTCTGG  | CTCTAGCTAT  | CCCGCCCTA   | ACTCCGCCCA  | TCCCGCCCTT  |
| 7141 | AACTCCGCC  | AGTTCCGCC   | ATTCTCCGCC  | CCATGGCTGA  | CTAATTTTTT  | TTATTTTATG  |
| 7201 | AGAGGCCGAG | GCCGCCTCGG  | CCTCTGAGCT  | ATTCCAGAAG  | TAGTGAGGAG  | GCTTTTTTTGG |
| 7261 | AGGCCTAGGG | ACGTACCCAA  | TTCGCCCTAT  | AGTGAGTCGT  | ATTACGCGCG  | CTCACTGGCC  |
| 7321 | GTCGTTTTAC | AACGTCTGTA  | CTGGGAAAAC  | CCTGGCGTTA  | CCCAACTTAA  | TCGCCCTTGCA |
| 7381 | GCACATCCCC | CTTTCGCCAG  | CTGGCGTAAT  | AGCGAAGAGG  | CCCGCACCGA  | TCGCCCTTCC  |
| 7441 | CAACAGTTGC | GCAGCCTGAA  | TGGCGAATGG  | GACGCGCCCT  | GTAGCGGCGC  | ATTAAGCGCG  |
| 7501 | GCGGGTGTGG | TGGTTACGCG  | CAGCGTGACC  | GCTACACTTG  | CCAGCGCCCT  | AGCGCCCGCT  |
| 7561 | CCTTTCGCTT | TCTTCCCTTC  | CCTTCTCGCC  | ACGTTCCGCC  | GCTTTCCTCC  | TCAAGCTCTA  |
| 7621 | AATCGGGGGC | TCCCTTTAGG  | GTTCCGATTT  | AGTGCTTTAC  | GGCACCTCGA  | CCCCAAAAAA  |
| 7681 | CTTGATTAGG | GTGATGGTTC  | ACGTAGTGGG  | CCATCGCCCT  | GATAGACGGT  | TTTTTCGCCCT |
| 7741 | TTGACGTTGG | AGTCCACGTT  | CTTTAATAGT  | GGACTCTTGT  | TCCAAACTGG  | AACAACACTC  |
| 7801 | AACCTATCT  | CGGTCTATTC  | TTTTGATTTA  | TAAGGGATTT  | TGCCGATTTT  | GGCCTATTGG  |
| 7861 | TTAAAAAATG | AGCTGATTTA  | ACAAAAATTT  | AACGCGAATT  | TTAACAAAAT  | ATTAACGCTT  |
| 7921 | ACAATTTAGG | TGGCACTTTT  | CGGGGAAAATG | TGCGCGGAAC  | CCCTATTTGT  | TTATTTTTCT  |
| 7981 | AAATACATTC | AAATATGTAT  | CCGCTCATGA  | GACAATAACC  | CTGATAAATG  | CTTCAATAAT  |
| 8041 | ATTGAAAAAG | GAAGAGTATG  | AGTATTCAAC  | ATTTCCGTGT  | CGCCCTTATT  | CCTTTTTTTG  |

8101 CGGCATTTTG CCTTCCTGTT TTTGCTCACC CAGAAACGCT GGTGAAAGTA AAAGATGCTG  
8161 AAGATCAGTT GGGTGCACGA GTGGGTTACA TCGAACTGGA TCTCAACAGC GGTAAGATCC  
8221 TTGAGAGTTT TCGCCCCGAA GAACGTTTTT CAATGATGAG CACTTTTTAAA GTTCTGCTAT  
8281 GTGGCGCGGT ATTATCCCGT ATTGACGCCG GGCAAGAGCA ACTCGGTTCG CGCATACACT  
8341 ATTCTCAGAA TGA CT TGGTT GAGTACTCAC CAGTCACAGA AAAGCATCTT ACGGATGGCA  
8401 TGACAGTAAG AGAATTATGC AGTGCTGCCA TAACCATGAG TGATAACACT GCGGCCAACT  
8461 TACTTCTGAC AACGATCGGA GGACCGAAGG AGCTAACCGC TTTTTTGCAC AACATGGGGG  
8521 ATCATGTAAC TCGCCTTGAT CGTTGGGAAC CGGAGCTGAA TGAAGCCATA CCAAACGACG  
8581 AGCGTGACAC CACGATGCCT GTAGCAATGG CAACAACGTT GCGCAAAC TAACCTGGCG  
8641 AACTACTTAC TCTAGCTTCC CGGCAACAAT TAATAGACTG GATGGAGGCG GATAAAGTTG  
8701 CAGGACCACT TCTGCGCTCG GCCCTTCCGG CTGGCTGGTT TATTGCTGAT AAATCTGGAG  
8761 CCGGTGAGCG TGGGTCTCGC GGTATCATTG CAGCACTGGG GCCAGATGGT AAGCCCTCCC  
8821 GTATCGTAGT TATCTACACG ACGGGGAGTC AGGCAACTAT GGATGAACGA AATAGACAGA  
8881 TCGCTGAGAT AGGTGCCTCA CTGATTAAGC ATTGGTAACT GTCAGACCAA GTTTACTCAT  
8941 ATATACTTTA GATTGATTTA AAACCTCATT TTTAATTTAA AAGGATCTAG GTGAAGATCC  
9001 TTTTTGATAA TCTCATGACC AAAATCCCTT AACGTGAGTT TTCGTTCCAC TGAGCGTCAG  
9061 ACCCCGTAGA AAAGATCAAA GGATCTTCTT GAGATCCTTT TTTTCTGCGC GTAATCTGCT  
9121 GCTTGCAAAC AAAAAAACCA CCGTACCAG CGGTGGTTTG TTTGCCGGAT CAAGAGCTAC  
9181 CAACTCTTTT TCCGAAGGTA ACTGGCTTCA GCAGAGCGCA GATACCAAAT ACTGTTCTTC  
9241 TAGTGTAGCC GTAGTTAGGC CACCACTTCA AGAACTCTGT AGCACCGCCT ACATACCTCG  
9301 CTCTGCTAAT CCTGTTACCA GTGGCTGCTG CCAGTGGCGA TAAGTCTGT CTTACCGGGT  
9361 TGGACTCAAG ACGATAGTTA CCGGATAAGG CGCAGCGGTC GGGCTGAACG GGGGGTTCGT  
9421 GCACACAGCC CAGCTTGGAG CGAACGACCT ACACCGAACT GAGATACCTA CAGCGTGAGC  
9481 TATGAGAAAG CGCCACGCTT CCCGAAGGGA GAAAGGCGGA CAGGTATCCG GTAAGCGGCA  
9541 GGGTCGGAAC AGGAGAGCGC ACGAGGGAGC TTCCAGGGGG AAACGCCTGG TATCTTTATA  
9601 GTCCTGTCCG GTTTCGCCAC CTCTGACTTG AGCGTCGATT TTTGTGATGC TCGTCAGGGG  
9661 GCGGAGCCCT ATGGAAAAAC GCCAGCAACG CGGCCTTTTT ACGGTTCCCTG GCCTTTTGCT  
9721 GGCCTTTTGC TCACATGTTT TTTCTGCGT TATCCCCTGA TTCTGTGGAT AACCGTATTA  
9781 CCGCCTTTGA GTGAGCTGAT ACCGCTCGCC GCAGCCGAAC GACCGAGCGC AGCGAGTCAG  
9841 TGAGCGAGGA AGCGGAAGAG CGCCCAATAC GCAAACCGCC TCTCCCCGCG CGTTGGCCGA  
9901 TTCATTAATG CAGCTGGCAC GACAGGTTTC CCGACTGGAA AGCGGGCAGT GAGCGCAACG  
9961 CAATTAATGT GAGTTAGCTC ACTCATTAGG CACCCCAGGC TTTTACTTTT ATGCTTCCGG  
10021 CTCGTATGTT GTGTGGAATT GTGAGCGGAT AACAAATTTCA CACAGGAAAC AGCTATGACC  
10081 ATGATTACGC CAAGCGCGCA ATTAACCCTC ACTAAAGGGA ACAAAGCTG GAGCTGCAAG  
10141 CTT
